# Supplementary material
Source: PubMed Central journal article supplement (PMC6990686)
Supplement: jama-323-256-s002.pdf [file jama-323-256-s002.pdf]

## Supplementary Online Content

Matta MK, Florian J, Zusterzeel R, et al. Effect of sunscreen application on plasma concentration of sunscreen active ingredients: a randomized clinical trial [published January 21, 2020]. *JAMA*. doi:10.1001/jama.2019.20747

**eTable 1.** Active and Inactive ingredients

**eTable 2.** Complete Pharmacokinetic Parameters of Sunscreen Active Ingredients

**eTable 3.** Percentage of Study Participants With Samples Exceeding 0.5 ng/mL at Select Time Points on Day 1 by Product and Ingredient

**eTable 4.** Number and Percentage of Adverse Events by Treatment Group

**eFigure 1.** Pharmacokinetic Profiles of Sunscreen Active Ingredients Upon Multiple Applications

**eFigure 2.** Pharmacokinetic Profiles of Sunscreen Active Ingredients Upon Single Application

**eMethods 1.** Bioanalytical Method Conditions for Avobenzone and oxybenzone in Plasma

**eMethods 2.** Bioanalytical Method Conditions for Octocrylene in Plasma

**eMethods 3.** Bioanalytical Method Conditions for Homosalate, Octisalate, and Octinoxate in Plasma

**eMethods 4.** Bioanalytical Method Conditions for Avobenzone, Oxybenzone, and Octocrylene in Skin Samples

**eMethods 5.** Bioanalytical Method Conditions for Homosalate, Octisalate and Octinoxate in Skin Samples

**eDictionary.** Data Dictionary for Participant Data Listings – Plasma and Skin data

This supplementary material has been provided by the authors to give readers additional information about their work.

eTable 1. Active and Inactive Ingredients

| <b>Product</b>   | <b>Active Ingredients</b>                                                                 | <b>Inactive Ingredients</b>                                                                                                                                                                                                                                                                                                                                                                                                                                                                                                                                                                                                                                                                                                                                                                                                       |
|------------------|-------------------------------------------------------------------------------------------|-----------------------------------------------------------------------------------------------------------------------------------------------------------------------------------------------------------------------------------------------------------------------------------------------------------------------------------------------------------------------------------------------------------------------------------------------------------------------------------------------------------------------------------------------------------------------------------------------------------------------------------------------------------------------------------------------------------------------------------------------------------------------------------------------------------------------------------|
| Lotion           | Avobenzone 3%,<br>Octocrylene 6%,<br>Oxybenzone 4%                                        | Water, Ethylhexyl Benzoate, Butyloctyl Salicylate, Cetearyl Alcohol, Diisopropyl Adipate, Phenethyl Benzoate, Phenoxyethanol, Polymethylsilsesquioxane, VP/eicosene copolymer, Caprylyl Glycol, Dimethicone, Glycerine, Fragrance, Triethanolamine, Coco-Glucoside, Acrylates/C10-30 Alkyl acrylate crosspolymer, Methylparaben, Ceteth-10 Phosphate, Dicityl Phosphate, Propylparaben, Disodium EDTA, Paraffin, Xanthan Gum, Butyrospermum Parkii (Shea) butter, Mangifera Indica (Mango) seed butter, Sodium Ascorbyl Phosphate, Tocopheryl Acetate, Panthenol, Alov Barbadosensis Leaf Juice, Carica Papaya (Papaya) Fruit Extract, Colocasia Antiquorum Root Extract, Mangifera Indica (Mango) Fruit Extract, Passiflora Incarnata Fruit Extract, Plumeria Acutifolia Flower Extract, Psidium Guajava Fruit Extract           |
| Aerosol Spray    | Avobenzone 3%,<br>Homosalate 15%,<br>Octisalate 5%,<br>Octocrylene 10%,<br>Oxybenzone 6%  | Alcohol Denat., Isobutane, Butyloctyl Salicylate, Acrylates/ Octylacrylamide copolymer, Cyclopentasiloxane, Acrylates/Dimethicone Copolymer, Fragrance, Tocopheryl Acetate, Diethylhexyl 2,6-naphthalate, Ascorbyl Palmitate, Retinyl Palmitate, Tocopherol                                                                                                                                                                                                                                                                                                                                                                                                                                                                                                                                                                       |
| Nonaerosol Spray | Avobenzone 3%,<br>Homosalate 10%,<br>Octinoxate 7.5%<br>Octisalate 5%,<br>Octocrylene 10% | Alcohol Denat, Camellia Sinensis Leaf Extract, Cananga Odorata Flower Oil, Caprylic/Capric Triglyceride, Citrus Aurantifolia (Lime) Oil, Citrus Grandis (Grapefruit) Peel Oil, Citrus Limon Fruit Oil, Citrus Nobilis (Mandarin Orange) Peel Oil, Citrus Reticulata (Tangerine) Peel Oil, Citrus Sinensis Peel Oil, Dicaprylyl Carbonate, Diisopropyl Adipate, Euterpe Oleracea Fruit Extract, Helianthus Annuus (Sunflower) Seed Oil, Isodecyl Neopentanoate, Lavandula Angustifolia (Lavender) Oil, Mentha Piperita (Peppermint) Oil, Mentha Viridis (Spearmint) Leaf Oil, Tetrahexyldecyl Ascorbate (Vitamin C), Tridecyl Neopentanoate, VA/Butyl Maleate/Isobornyl Acrylate Copolymer, Vitis Vinifera (Grape) Seed Oil                                                                                                        |
| Pump Spray       | Avobenzone 3%,<br>Homosalate 10%,<br>Octinoxate 7.5%<br>Octisalate 5%                     | Caprylic/Capric Triglyceride, SD Alcohol 40-B., C12-15 Alkyl Benzoate, Octyldodecanol, Polyamide-3, Polyester-8, Diisopropyl Sebacate, Isodecyl Neopentanoate, Lauryl Lactate, Limonene, Diethylhexyl Syringylidenemalonate, Punica Granatum Fruit Extract, Citrus Aurantium Dulcis (Orange) Peel Extract, Citrus Grandis (Grapefruit) Peel Oil, Calendula Officinalis Flower Extract, Citrus Limon (Lemon) Peel Extract, Citrus Tangerina (Tangerine) Peel Extract, Elaeis Guineensis (Palm) Oil, Tocotrienols, Argania Spinosa Kernel Oil, Butyrospermum Parkii (Shea) Butter, Cocos Nucifera (Coconut) Oil, Helianthus Annuus (Sunflower) Seed Oil, Limnanthes Alba (Meadowfoam) Seed Oil, Raphanus Sativus (Radish) Seed Oil, Vitis Vinifera (Grape) Seed Oil, Tocopherol, Alaria Esculenta Extract, BHT, Citral, Citric Acid |

eTable 2. Complete Pharmacokinetic Parameters of Sunscreen Active Ingredients

|                                       | Lotion<br>Geometric Mean<br>[CV%] (range) | Aerosol Spray<br>Geometric Mean<br>[CV%] (range) | Nonaerosol Spray<br>Geometric Mean<br>[CV%] (range) | Pump Spray<br>Geometric Mean<br>[CV%] (range) |
|---------------------------------------|-------------------------------------------|--------------------------------------------------|-----------------------------------------------------|-----------------------------------------------|
| <b>Avobenzone</b>                     |                                           |                                                  |                                                     |                                               |
| AUC Day 1<br>(ng*h/mL)                | 23.1 (45.3%)<br>(10.6-40.6)               | 16.5 (85.7%)<br>(3.2-48.2)                       | 11.6 (99.1%)<br>(1.2-23.9)                          | 10.3 (61.5%)<br>(3.5-29.9)                    |
| AUC Day 4<br>(ng*h/mL)                | 93.4 (33.1%)<br>(53.3-150)                | 55.1 (64.4%)<br>(16.4-130.2)                     | 51.6 (45.2%)<br>(20.2-92.5)                         | 42.7 [37.3%]<br>(26.5-89.8)                   |
| AUC <sub>last</sub><br>(ng*h/mL)      | 591.2 (30.7%)<br>(303.2-890.1)            | 350.1 (69.3%)<br>(101.2-910.5)                   | 264.6 (107.3%)<br>(31.6-606.5)                      | 213.8 (71.9%)<br>(43.4-545.1)                 |
| C <sub>max</sub> (ng/mL)<br>Overall   | 7.1 (73.9%)<br>(2.9-28)                   | 3.5 (70.9%)<br>(1-9)                             | 3.5 (73%)<br>(1-10)                                 | 3.3 (47.8%)<br>(1.2-6.2)                      |
| C <sub>max</sub> (ng/mL) Day<br>1     | 1.6 (49%)<br>(0.7-2.7)                    | 1.2 (90.6%)<br>(0.2-5.2)                         | 1 (65.2%)<br>(0.3-1.9)                              | 0.7 (64.5%)<br>(0.3-2)                        |
| C <sub>max</sub> (ng/mL) Day<br>4     | 5.7 (58.7%)<br>(2.9-20.5)                 | 3.2 (65.5%)<br>(1-7.8)                           | 3.4 (73.1%)<br>(1-10)                               | 3.1 [40.3%]<br>(2.0-6.2)                      |
| C <sub>predose</sub> Day 2<br>(ng/mL) | 1.4 (57.3%)<br>(0.5-2.7)                  | 1 (93.6%)<br>(0.2-5.2)                           | 0.9 (65.9%)<br>(0.3-1.9)                            | 0.6 (63.3%)<br>(0.3-1.6)                      |
| C <sub>predose</sub> Day 3<br>(ng/mL) | 2.7 (43.2%)<br>(1.3-4.6)                  | 2.1 (79.9%)<br>(0.4-7.7)                         | 1.6 (63.4%)<br>(0.6-4.3)                            | 1.2 (56.9%)<br>(0.7-3.9)                      |
| C <sub>predose</sub> Day 4<br>(ng/mL) | 3.5 (43.4%)<br>(1.5-6.6)                  | 2.1 (63%)<br>(0.7-4.9)                           | 1.8 (55.1%)<br>(0.6-3.8)                            | 1.3 (51.1%)<br>(0.8-3.6)                      |
| Conc. Day 5<br>(ng/mL)                | 3.9 (28.9%)<br>(2.5-5.8)                  | 2.1 (62.7%)<br>(0.7-5.3)                         | 2 (41.2%)<br>(1-3.4)                                | 1.4 (44.7%)<br>(0.7-3.2)                      |
| Conc. Day 6<br>(ng/mL)                | 2.4 (37.2%)<br>(1.4-4.2)                  | 1.6 (68.7%)<br>(0.4-4.1)                         | 1.3 (54.7%)<br>(0.6-2.8)                            | 0.9 (29%)<br>(0.6-1.6)                        |
| Conc. Day 7<br>(ng/mL)                | 1.6 (29.4%)<br>(1.1-2.4)                  | 1.1 (56.7%)<br>(0.5-3.1)                         | 1.1 (54%)<br>(0.6-2.7)                              | 0.8 (34.2%)<br>(0.4-1.4)                      |
| Skin Day 7<br>(ng/cm <sup>2</sup> )   | 843.1 [96%]<br>(396.2-6556.6)             | 939.3 [77.3%]<br>(393.8-3840.6)                  | 1157.3 [117.4%]<br>(333.9-3784.3)                   | 498.7 [200.3%]<br>(52.9-1852.9)               |
| Conc Day 10<br>(ng/mL)                | 0.5 (28.5%)<br>(0.4-1)                    | 0.3 (196.8%)<br>(0-1.2)                          | 0.5 (38.6%)<br>(0.2-0.8)                            | 0.1 (314.5%)<br>(0-0.6)                       |
| Conc Day 14<br>(ng/mL)                | 0.4 (41.9%)<br>(0.2-1)                    | 0.1 (473.8%)<br>(0-0.9)                          | 0.2 (332.8%)<br>(0-0.6)                             | 0.1 (465.2%)<br>(0-0.6)                       |
| Skin Day 14<br>(ng/cm <sup>2</sup> )  | 39.8 [99%]<br>(12.7-133.1)                | 25.9 [209.1%]<br>(6.2-733.5)                     | 75.8 [378.1%]<br>(5.3-854.9)                        | 48.3 [295%]<br>(8.9-650.4)                    |
| Conc Day 21<br>(ng/mL)                | 0.1 (393.6%)<br>(0-1)                     | 0.1 (461.5%)<br>(0-0.4)                          | 0.1 (475.8%)<br>(0-0.6)                             | 0 (472.4%)<br>(0-0.7)                         |
| Terminal Half-<br>Life (h)            | 112.3 (69.7%)<br>(63.1-481.6)             | 94.2 (80.1%)<br>(29-434.5)                       | 101.1 (66.6%)<br>(50.4-306)                         | 73.7 (93.1%)<br>(29.1-299.2)                  |

|                                       | Lotion<br>Geometric Mean<br>[CV%] (range) | Aerosol Spray<br>Geometric Mean<br>[CV%] (range) | Nonaerosol Spray<br>Geometric Mean<br>[CV%] (range) | Pump Spray<br>Geometric Mean<br>[CV%] (range) |
|---------------------------------------|-------------------------------------------|--------------------------------------------------|-----------------------------------------------------|-----------------------------------------------|
| T <sub>max</sub> (h) Overall          | 69.3 (20.5%)<br>(52-95)                   | 67.6 (30.9%)<br>(33-95)                          | 68.3 (21.4%)<br>(47-95)                             | 71.2 (21%)<br>(47-86)                         |
| T <sub>max</sub> (h) Day 1            | 13.7 (43%)<br>(8-23)                      | 14.1 (46.7%)<br>(9-23)                           | 11.4 (158%)<br>(0.5-23)                             | 14.8 (42.1%)<br>(9-23)                        |
| T <sub>max</sub> (h) Day 4            | 81.9 (8.1%)<br>(73-95)                    | 81.3 (8.6%)<br>(74-95)                           | 81.9 (6.5%)<br>(74-95)                              | 81.3 (4.4%)<br>(73-86)                        |
| <b>Oxybenzone</b>                     |                                           |                                                  |                                                     |                                               |
| AUC Day 1<br>(ng*h/mL)                | 1204 (33.4%)<br>(683.2-1901.4)            | 1159.6 (51.3%)<br>(524.4-3137.6)                 | NA                                                  | NA                                            |
| AUC Day 4<br>(ng*h/mL)                | 3443.7 (34.8%)<br>(2053.7-5579.6)         | 2757.3 (41.3%)<br>(1390.7-5216)                  | NA                                                  | NA                                            |
| AUC <sub>last</sub><br>(ng*h/mL)      | 16297.2 (30.4%)<br>(9746.8-27391.1)       | 14292.4 (41.2%)<br>(8246.3-29719.2)              | NA                                                  | NA                                            |
| C <sub>max</sub> (ng/mL)<br>Overall   | 258.1 (53%)<br>(131.3-498.1)              | 180.1 (57.3%)<br>(70.1-476.9)                    | NA                                                  | NA                                            |
| C <sub>max</sub> (ng/mL) Day<br>1     | 94.2 (44.3%)<br>(44.6-177.6)              | 85.4 (73.9%)<br>(34.8-401.2)                     | NA                                                  | NA                                            |
| C <sub>max</sub> (ng/mL) Day<br>4     | 252.3 (54.8%)<br>(131.3-498.1)            | 171.1 (52.1%)<br>(66-426.8)                      | NA                                                  | NA                                            |
| C <sub>predose</sub> Day 2<br>(ng/mL) | 30.1 (40.9%)<br>(16.6-58.9)               | 32.9 (63.3%)<br>(17.6-140.2)                     | NA                                                  | NA                                            |
| C <sub>predose</sub> Day 3<br>(ng/mL) | 79 (53.8%)<br>(42.5-188.4)                | 85.9 (76.1%)<br>(34.1-377.9)                     | NA                                                  | NA                                            |
| C <sub>predose</sub> Day 4<br>(ng/mL) | 95.3 (62%)<br>(36-278.8)                  | 99 (42.1%)<br>(63.7-188.9)                       | NA                                                  | NA                                            |
| Conc. Day 5<br>(ng/mL)                | 114.8 (39.4%)<br>(64.9-244.3)             | 91.2 (44.4%)<br>(49.2-162.6)                     | NA                                                  | NA                                            |
| Conc. Day 6<br>(ng/mL)                | 43.2 (30.6%)<br>(28-64.7)                 | 46.7 (53%)<br>(25.6-112.9)                       | NA                                                  | NA                                            |
| Conc. Day 7<br>(ng/mL)                | 30.6 (53.3%)<br>(13.7-70)                 | 28.3 (42.5%)<br>(16.8-62.4)                      | NA                                                  | NA                                            |
| Skin Day 7<br>(ng/cm <sup>2</sup> )   | 358.7 [195.1%]<br>(40.7-5848.6)           | 698.5 [154.9%]<br>(114.2-6729.9)                 | NA                                                  | NA                                            |
| Conc Day 10<br>(ng/mL)                | 7.8 (62.6%)<br>(3.3-24.6)                 | 8.8 (51%)<br>(4.8-27.5)                          | NA                                                  | NA                                            |
| Conc Day 14<br>(ng/mL)                | 5.1 (92.3%)<br>(1.6-32.5)                 | 3.8 (68.2%)<br>(1.3-9)                           | NA                                                  | NA                                            |
| Skin Day 14<br>(ng/cm <sup>2</sup> )  | 18.2 [195%]<br>(3.9-341.3)                | 29.1 [238.2%]<br>(7-979.6)                       | NA                                                  | NA                                            |

|                                       | Lotion<br>Geometric Mean<br>[CV%] (range) | Aerosol Spray<br>Geometric Mean<br>[CV%] (range) | Nonaerosol Spray<br>Geometric Mean<br>[CV%] (range) | Pump Spray<br>Geometric Mean<br>[CV%] (range) |
|---------------------------------------|-------------------------------------------|--------------------------------------------------|-----------------------------------------------------|-----------------------------------------------|
| Conc Day 21<br>(ng/mL)                | 1.3 (517.6%)<br>(0-14.4)                  | 2 (73%)<br>(0.6-8)                               | NA                                                  | NA                                            |
| Terminal Half-<br>Life (h)            | 78.5 (40.6%)<br>(41.8-135.3)              | 79.2 (49.3%)<br>(27.4-206.7)                     | NA                                                  | NA                                            |
| T <sub>max</sub> (h) Overall          | 78.2 (12.2%)<br>(57-95)                   | 72.6 (14.8%)<br>(52-84)                          | NA                                                  | NA                                            |
| T <sub>max</sub> (h) Day 1            | 4.9 (64.8%)<br>(1.5-12)                   | 7.1 (55%)<br>(3-14)                              | NA                                                  | NA                                            |
| T <sub>max</sub> (h) Day 4            | 80.7 (7.1%)<br>(73-95)                    | 78.3 (6.1%)<br>(73-86)                           | NA                                                  | NA                                            |
| <b>Octocrylene</b>                    |                                           |                                                  |                                                     |                                               |
| AUC Day 1<br>(ng*h/mL)                | 20 (62.9%)<br>(6.4-38.1)                  | 14 (1772.3%)<br>(0-94.2)                         | 16.9 (66.8%)<br>(6.5-40.4)                          | NA                                            |
| AUC Day 4<br>(ng*h/mL)                | 94.7 (48.6%)<br>(41.4-210)                | 89.4 (67.4%)<br>(23.2-178.2)                     | 89.5 (60%)<br>(33.2-177)                            | NA                                            |
| AUC <sub>last</sub><br>(ng*h/mL)      | 526.8 (42.6%)<br>(243.5-990.3)            | 514.6 (86.3%)<br>(96-1095)                       | 434.2 (131%)<br>(38.2-1538.7)                       | NA                                            |
| C <sub>max</sub> (ng/mL)<br>Overall   | 7.8 (87.1%)<br>(2.6-38.7)                 | 6.6 (78.1%)<br>(1.4-16.2)                        | 6.6 (103.9%)<br>(1.7-34.4)                          | NA                                            |
| C <sub>max</sub> (ng/mL) Day<br>1     | 1.5 (67.8%)<br>(0.5-3.6)                  | 1.3 (438%)<br>(0-12.3)                           | 1.4 (73.9%)<br>(0.4-3.1)                            | NA                                            |
| C <sub>max</sub> (ng/mL) Day<br>4     | 6.8 (83.4%)<br>(2.5-38.7)                 | 5.9 (66.5%)<br>(1.4-12.9)                        | 6.4 (111%)<br>(1.7-34.4)                            | NA                                            |
| C <sub>predose</sub> Day 2<br>(ng/mL) | 1.4 (72.9%)<br>(0.5-3.6)                  | 1.2 (435.8%)<br>(0-12.3)                         | 1.2 (86.8%)<br>(0.4-3.1)                            | NA                                            |
| C <sub>predose</sub> Day 3<br>(ng/mL) | 2.6 (47.7%)<br>(1-4.9)                    | 3.3 (105.3%)<br>(0.4-16.2)                       | 2.8 (75.4%)<br>(1.2-10.6)                           | NA                                            |
| C <sub>predose</sub> Day 4<br>(ng/mL) | 3.6 (57.7%)<br>(1.6-8.9)                  | 3.6 (71.5%)<br>(1-7.7)                           | 3.2 (67.5%)<br>(1.1-9.4)                            | NA                                            |
| Conc. Day 5<br>(ng/mL)                | 3.8 (40.3%)<br>(2.5-8.1)                  | 3.5 (67.9%)<br>(1.2-7.8)                         | 3.5 (53.8%)<br>(1.7-6.6)                            | NA                                            |
| Conc. Day 6<br>(ng/mL)                | 2.7 (51.1%)<br>(1.3-5.5)                  | 2.8 (87.5%)<br>(0.5-5.8)                         | 2.6 (75.4%)<br>(1.1-8.2)                            | NA                                            |
| Conc. Day 7<br>(ng/mL)                | 1.9 (44.2%)<br>(1-2.9)                    | 2.1 (63.8%)<br>(0.6-4.9)                         | 2.3 (92.9%)<br>(0.6-8.6)                            | NA                                            |
| Skin Day 7<br>(ng/cm <sup>2</sup> )   | 2090.7 [99.6%]<br>(730.6-16676.6)         | 3141.9 [97.8%]<br>(570.1-19841.8)                | 4488.8 [120.4%]<br>(1072.3-20606.2)                 | NA                                            |
| Conc Day 10<br>(ng/mL)                | 0.1 (826.8%)<br>(0-1.5)                   | 0.2 (903.9%)<br>(0-2.7)                          | 0.8 (54%)<br>(0.4-2.1)                              | NA                                            |

|                                       | Lotion<br>Geometric Mean<br>[CV%] (range) | Aerosol Spray<br>Geometric Mean<br>[CV%] (range) | Nonaerosol Spray<br>Geometric Mean<br>[CV%] (range) | Pump Spray<br>Geometric Mean<br>[CV%] (range) |
|---------------------------------------|-------------------------------------------|--------------------------------------------------|-----------------------------------------------------|-----------------------------------------------|
| Conc Day 14<br>(ng/mL)                | 0 (669.5%)<br>(0-1.2)                     | 0 (1645.7%)<br>(0-2)                             | 0.1 (1254%)<br>(0-1.1)                              | NA                                            |
| Skin Day 14<br>(ng/cm <sup>2</sup> )  | 123.3 [74.6%]<br>(50-327)                 | 111.1 [187.1%]<br>(35.1-3239.2)                  | 354.9 [335.7%]<br>(39.2-3144.1)                     | NA                                            |
| Conc Day 21<br>(ng/mL)                | 0 (262.2%)<br>(0-1.4)                     | 0 (0%)<br>(0-0)                                  | 0 (1253.9%)<br>(0-1.2)                              | NA                                            |
| Terminal Half-<br>Life (h)            | 49.5 (59.1%)<br>(23.7-121.8)              | 48.4 (36.7%)<br>(28.9-70.9)                      | 79.1 (40.1%)<br>(41.2-118.8)                        | NA                                            |
| T <sub>max</sub> (h) Overall          | 72 (15%)<br>(57-82)                       | 65.3 (38.4%)<br>(33-95)                          | 69 (21.6%)<br>(47-95)                               | NA                                            |
| T <sub>max</sub> (h) Day 1            | 18.7 (32.4%)<br>(10-23)                   | 8.7 (1067.2%)<br>(0-23)                          | 12.5 (147.5%)<br>(0.5-23)                           | NA                                            |
| T <sub>max</sub> (h) Day 4            | 80.9 (7.1%)<br>(73-95)                    | 80.5 (7.2%)<br>(74-95)                           | 81 (7.4%)<br>(73-95)                                | NA                                            |
| <b>Homosalate</b>                     |                                           |                                                  |                                                     |                                               |
| AUC Day 1<br>(ng*h/mL)                | NA                                        | 104 (87.1%)<br>(24-424.9)                        | 62.3 (42.4%)<br>(32.5-111.6)                        | 47.6 (79.5%)<br>(14.6-130.7)                  |
| AUC Day 4<br>(ng*h/mL)                | NA                                        | 350.8 (52.1%)<br>(140.6-726.7)                   | 267.4 (46.8%)<br>(142.3-457.3)                      | 199.0 [52.9%]<br>(101.9-452.9)                |
| AUC <sub>last</sub><br>(ng*h/mL)      | NA                                        | 1943.8 (49.3%)<br>(903-4219.7)                   | 1212 (107.7%)<br>(170.9-3463.6)                     | 843.6 (95%)<br>(148.4-2444.2)                 |
| C <sub>max</sub> (ng/mL)<br>Overall   | NA                                        | 23.1 (68%)<br>(8.7-67.7)                         | 17.9 (61.7%)<br>(7.4-39)                            | 13.9 (70.2%)<br>(3.7-35.8)                    |
| C <sub>max</sub> (ng/mL) Day<br>1     | NA                                        | 7.6 (108.7%)<br>(1.5-44.9)                       | 4.6 (48.7%)<br>2-8.8)                               | 3.8 (110%)<br>(0.9-23.1)                      |
| C <sub>max</sub> (ng/mL) Day<br>4     | NA                                        | 21.9 (60.5%)<br>(8.7-58.1)                       | 18.1 (70%)<br>(7.6-39)                              | 14.3 [60.7%]<br>(6.7-35.8)                    |
| C <sub>predose</sub> Day 2<br>(ng/mL) | NA                                        | 5.1 (87.4%)<br>(1.5-31.7)                        | 3.4 (47.2%)<br>(1.6-7.1)                            | 2.7 (112.2%)<br>(0.7-23.1)                    |
| C <sub>predose</sub> Day 3<br>(ng/mL) | NA                                        | 12.7 (90.8%)<br>(2.9-67.7)                       | 8.8 (65.2%)<br>(2.8-19.6)                           | 5 (54%)<br>(1.7-10.1)                         |
| C <sub>predose</sub> Day 4<br>(ng/mL) | NA                                        | 14.2 (54.2%)<br>(5.5-28.1)                       | 10.1 (47.3%)<br>(5.6-23.9)                          | 5.9 (60.6%)<br>(2.9-18.6)                     |
| Conc. Day 5<br>(ng/mL)                | NA                                        | 12.8 (46.4%)<br>(6.7-22.8)                       | 10.1 (63.7%)<br>(4.3-26.1)                          | 5.9 (61%)<br>(2.5-12.9)                       |
| Conc. Day 6<br>(ng/mL)                | NA                                        | 7.6 (58.1%)<br>(2.7-16.9)                        | 5.5 (83.6%)<br>(2.3-18.5)                           | 3.8 (60%)<br>(1.5-9.6)                        |
| Conc. Day 7<br>(ng/mL)                | NA                                        | 5.2 (41.4%)<br>(2.7-10.3)                        | 4.7 (103.8%)<br>(1.4-21.7)                          | 3.5 (114.1%)<br>(0.5-11.5)                    |

|                                       | Lotion<br>Geometric Mean<br>[CV%] (range) | Aerosol Spray<br>Geometric Mean<br>[CV%] (range) | Nonaerosol Spray<br>Geometric Mean<br>[CV%] (range) | Pump Spray<br>Geometric Mean<br>[CV%] (range) |
|---------------------------------------|-------------------------------------------|--------------------------------------------------|-----------------------------------------------------|-----------------------------------------------|
| Skin Day 7<br>(ng/cm <sup>2</sup> )   | NA                                        | 4517 [102.2%]<br>(1180.3-32776.8)                | 2814.9 [178.7%]<br>(361.9-15029.4)                  | 2165.7 [164.1%]<br>(401.9-7248)               |
| Conc Day 10<br>(ng/mL)                | NA                                        | 1.2 (65.2%)<br>(0.5-5.2)                         | 1.3 (68.7%)<br>(0.7-4)                              | 0.2 (1405.7%)<br>(0-2.4)                      |
| Conc Day 14<br>(ng/mL)                | NA                                        | 0.4 (637.8%)<br>(0-3.8)                          | 0.7 (410.2%)<br>(0-5.8)                             | 0.2 (2388.7%)<br>(0-2.3)                      |
| Skin Day 14<br>(ng/cm <sup>2</sup> )  | NA                                        | 190.2 [202.9%]<br>(72.8-5218.6)                  | 436.9 [253.6%]<br>(56.5-5988.6)                     | 181.8 [157.1%]<br>(31.3-839.6)                |
| Conc Day 21<br>(ng/mL)                | NA                                        | 0.2 (723%)<br>(0-1)                              | 0.3 (1654.1%)<br>(0-2.9)                            | 0 (1552.1%)<br>(0-3.9)                        |
| Terminal Half-<br>Life (h)            | NA                                        | 67.9 (62.2%)<br>(24.4-155.6)                     | 78.4 (61.6%)<br>(49-162.4)                          | 46.9 (67.5%)<br>(18-82.4)                     |
| T <sub>max</sub> (h) Overall          | NA                                        | 68.5 (29.6%)<br>(33-86)                          | 57 (51.5%)<br>(14-81)                               | 67.8 (38%)<br>(23-86)                         |
| T <sub>max</sub> (h) Day 1            | NA                                        | 12.1 (46.3%)<br>(6-23)                           | 9.1 (143.7%)<br>(0.5-23)                            | 12.2 (42.5%)<br>(8-23)                        |
| T <sub>max</sub> (h) Day 4            | NA                                        | 78.5 (5.8%)<br>(73-86)                           | 80.6 (7.5%)<br>(74-95)                              | 80.1 (6.2%)<br>(73-86)                        |
| <b>Octisalate</b>                     |                                           |                                                  |                                                     |                                               |
| AUC Day 1<br>(ng*h/mL)                | NA                                        | 12 (1529.4%)<br>(0-94.6)                         | 14.7 (89.6%)<br>(2.7-28)                            | 4.5 (9367.4%)<br>(0-75.7)                     |
| AUC Day 4<br>(ng*h/mL)                | NA                                        | 67.9 (55.5%)<br>(30.1-172.6)                     | 76.9 (62.8%)<br>(32.5-137.5)                        | 54.0 [83.3%]<br>(13.8-134.3)                  |
| AUC <sub>last</sub><br>(ng*h/mL)      | NA                                        | 281.3 (75.8%)<br>(72.2-814.7)                    | 277.3 (116.2%)<br>(53-809.7)                        | 208.1 (115.4%)<br>(33.8-860.1)                |
| C <sub>max</sub> (ng/mL)<br>Overall   | NA                                        | 5.1 (81.6%)<br>(2-17.3)                          | 5.8 (77.4%)<br>(2.3-16.7)                           | 4.6 (97.6%)<br>(0.9-12.2)                     |
| C <sub>max</sub> (ng/mL) Day<br>1     | NA                                        | 1.3 (441.4%)<br>(0-12.9)                         | 1.4 (51.6%)<br>(0.5-2.3)                            | 0.7 (974.7%)<br>(0-10.6)                      |
| C <sub>max</sub> (ng/mL) Day<br>4     | NA                                        | 4.6 (63.8%)<br>(2-13.6)                          | 6.1 (88.7%)<br>(1.9-16.7)                           | 4.6 [85.1%]<br>(1.5-12.2)                     |
| C <sub>predose</sub> Day 2<br>(ng/mL) | NA                                        | 0.4 (564.2%)<br>(0-5.2)                          | 0.4 (478.9%)<br>(0-2.1)                             | 0.2 (1837.2%)<br>(0-10.6)                     |
| C <sub>predose</sub> Day 3<br>(ng/mL) | NA                                        | 2.4 (104.9%)<br>(0.5-14.8)                       | 2.3 (94.3%)<br>(0.5-7.7)                            | 0.9 (303.8%)<br>(0-3.1)                       |
| C <sub>predose</sub> Day 4<br>(ng/mL) | NA                                        | 2.7 (56.5%)<br>(1.2-6.2)                         | 2.6 (64.2%)<br>(1.1-6.5)                            | 1.4 (75%)<br>(0.5-5.6)                        |
| Conc. Day 5<br>(ng/mL)                | NA                                        | 2.1 (54.8%)<br>(0.9-3.8)                         | 2.3 (100.9%)<br>(0.8-8.9)                           | 0.9 (441%)<br>(0-3.5)                         |

|                                       | Lotion<br>Geometric Mean<br>[CV%] (range) | Aerosol Spray<br>Geometric Mean<br>[CV%] (range) | Nonaerosol Spray<br>Geometric Mean<br>[CV%] (range) | Pump Spray<br>Geometric Mean<br>[CV%] (range) |
|---------------------------------------|-------------------------------------------|--------------------------------------------------|-----------------------------------------------------|-----------------------------------------------|
| Conc. Day 6<br>(ng/mL)                | NA                                        | 0.8 (278.6%)<br>(0-3)                            | 1.3 (111.8%)<br>(0.4-5.3)                           | 0.7 (343.8%)<br>(0-4.4)                       |
| Conc. Day 7<br>(ng/mL)                | NA                                        | 0.4 (444.3%)<br>(0-1.4)                          | 0.6 (1247.5%)<br>(0-5.9)                            | 0.5 (1011.8%)<br>(0-4.5)                      |
| Skin Day 7<br>(ng/cm <sup>2</sup> )   | NA                                        | 1265.4 [107.3%]<br>(277.4-9311.2)                | 1128.3 [204.5%]<br>(125.4-6746.4)                   | 907.8 [168.7%]<br>(193.6-2767.7)              |
| Conc Day 10<br>(ng/mL)                | NA                                        | 0 (229%)<br>(0-0.9)                              | 0 (718.4%)<br>(0-0.8)                               | 0 (209.3%)<br>(0-0.5)                         |
| Conc Day 14<br>(ng/mL)                | NA                                        | 0 (163.6%)<br>(0-0.4)                            | 0 (630.3%)<br>(0-1.4)                               | 0 (557.2%)<br>(0-0.5)                         |
| Skin Day 14<br>(ng/cm <sup>2</sup> )  | NA                                        | 63.9 [174.6%]<br>(17.9-1194.1)                   | 195.7 [250.4%]<br>(28.9-2591.1)                     | 82.3 [85.6%]<br>(32.3-263.4)                  |
| Conc Day 21<br>(ng/mL)                | NA                                        | 0 (0%)<br>(0-0)                                  | 0 (260.8%)<br>(0-0.9)                               | 0 (286.2%)<br>(0-1.1)                         |
| Terminal Half-<br>Life (h)            | NA                                        | 37.4 (61.2%)<br>(19.3-122.5)                     | 27.3 (37.2%)<br>(16.9-41)                           | 77.1 (213.8%)<br>(22.9-323.6)                 |
| T <sub>max</sub> (h) Overall          | NA                                        | 68.2 (29.2%)<br>(33-84)                          | 65.2 (29.6%)<br>(33-86)                             | 68.6 (39.2%)<br>(23-84)                       |
| T <sub>max</sub> (h) Day 1            | NA                                        | 5.9 (820.8%)<br>(0-23)                           | 7.8 (126.9%)<br>(0.5-23)                            | 3.3 (4279.5%)<br>(0-23)                       |
| T <sub>max</sub> (h) Day 4            | NA                                        | 78.2 (5.2%)<br>(73-84)                           | 80.6 (4.5%)<br>(74-86)                              | 82.0 (2%)<br>(81-86)                          |
| <b>Octinoxate</b>                     |                                           |                                                  |                                                     |                                               |
| AUC Day 1<br>(ng*h/mL)                | NA                                        | NA                                               | 21.6 (116.4%)<br>(2.7-57.7)                         | 9.9 (1435.1%)<br>(0-53.3)                     |
| AUC Day 4<br>(ng*h/mL)                | NA                                        | NA                                               | 103.4 (56.2%)<br>(45.1-213.5)                       | 79.5 [50.1%]<br>(40.4-144.7)                  |
| AUC <sub>last</sub><br>(ng*h/mL)      | NA                                        | NA                                               | 449.2 (134.1%)<br>(74.2-1843.2)                     | 295.8 (92.8%)<br>(50.9-775.4)                 |
| C <sub>max</sub> (ng/mL)<br>Overall   | NA                                        | NA                                               | 7.9 (86.5%)<br>(2.6-30.6)                           | 5.2 (68.2%)<br>(1.5-11.8)                     |
| C <sub>max</sub> (ng/mL) Day<br>1     | NA                                        | NA                                               | 2 (96%)<br>(0.6-5)                                  | 1.1 (326.2%)<br>(0-4.1)                       |
| C <sub>max</sub> (ng/mL) Day<br>4     | NA                                        | NA                                               | 7.6 (108.3%)<br>(2.4-30.6)                          | 6.1 [53.8%]<br>(3.2-11.8)                     |
| C <sub>predose</sub> Day 2<br>(ng/mL) | NA                                        | NA                                               | 1.4 (423.8%)<br>(0-4.5)                             | 0.8 (280.6%)<br>(0-2.6)                       |
| C <sub>predose</sub> Day 3<br>(ng/mL) | NA                                        | NA                                               | 3.6 (91.4%)<br>(0.8-12.6)                           | 1.9 (46.9%)<br>(0.7-3.3)                      |



|                                       | Lotion<br>Geometric Mean<br>[CV%] (range) | Aerosol Spray<br>Geometric Mean<br>[CV%] (range) | Nonaerosol Spray<br>Geometric Mean<br>[CV%] (range) | Pump Spray<br>Geometric Mean<br>[CV%] (range) |
|---------------------------------------|-------------------------------------------|--------------------------------------------------|-----------------------------------------------------|-----------------------------------------------|
| C <sub>predose</sub> Day 4<br>(ng/mL) | NA                                        | NA                                               | 4.1 (56%)<br>(2-10.8)                               | 2.5 (57.2%)<br>(1.1-6.3)                      |
| Conc. Day 5<br>(ng/mL)                | NA                                        | NA                                               | 3.7 (70.8%)<br>(1.3-9.9)                            | 2.3 (58.2%)<br>(1.2-6.7)                      |
| Conc. Day 6<br>(ng/mL)                | NA                                        | NA                                               | 2.3 (87.8%)<br>(0.8-10.1)                           | 1.7 (58.2%)<br>(0.9-5)                        |
| Conc. Day 7<br>(ng/mL)                | NA                                        | NA                                               | 1.3 (571.9%)<br>(0-12.5)                            | 1 (453.9%)<br>(0-5.8)                         |
| Skin Day 7<br>(ng/cm <sup>2</sup> )   | NA                                        | NA                                               | 2373.6 [149.7%]<br>(493.2-12200.5)                  | 1675.2 [132.7%]<br>(470-5856.9)               |
| Conc Day 10<br>(ng/mL)                | NA                                        | NA                                               | 0 (1662.9%)<br>(0-2.3)                              | 0.1 (1238.3%)<br>(0-1.2)                      |
| Conc Day 14<br>(ng/mL)                | NA                                        | NA                                               | 0 (1653.6%)<br>(0-2.3)                              | 0 (961.9%)<br>(0-0.8)                         |
| Skin Day 14<br>(ng/cm <sup>2</sup> )  | NA                                        | NA                                               | 284 [353.3%]<br>(22.2-2977.6)                       | 151.3 [410.9%]<br>(24-1809.8)                 |
| Conc Day 21<br>(ng/mL)                | NA                                        | NA                                               | 0 (1399.2%)<br>(0-1)                                | 0 (332.7%)<br>(0-1.5)                         |
| Terminal Half-<br>Life (h)            | NA                                        | NA                                               | 50.6 (74.4%)<br>(25.8-109.5)                        | 157.4 (229.8%)<br>(31.7-671)                  |
| T <sub>max</sub> (h) Overall          | NA                                        | NA                                               | 68.1 (22.6%)<br>(47-95)                             | 80.4 (16.9%)<br>(57-120)                      |
| T <sub>max</sub> (h) Day 1            | NA                                        | NA                                               | 12.2 (163.9%)<br>(0.5-23)                           | 6.1 (1308.5%)<br>(0-23)                       |
| T <sub>max</sub> (h) Day 4            | NA                                        | NA                                               | 80 (7.9%)<br>(73-95)                                | 80.7 (4.4%)<br>(73-86)                        |

Abbreviations: CV, coefficient of variation.

C<sub>max</sub> Overall is the maximum active ingredient concentration observed over the study duration. C<sub>max</sub> Day 1 is the maximum concentration over the interval of 0 to 23 h. C<sub>max</sub> Day 4 is the maximum active ingredient concentration over the interval of 71 to 95 h.

T<sub>max</sub> Overall is reported as median (range) and is the time of maximum active ingredient concentration observed over the study duration. T<sub>max</sub> Day 1 is the time of maximum active ingredient concentration over the interval of 0 to 23 h. T<sub>max</sub> Day 4 is the time of maximum active ingredient concentration over the interval of 71 to 95 h.

AUC<sub>last</sub> is the area under the curve for the active ingredient from time 0 to last detectable observation. AUC Day 1 is the area under the curve for the active ingredient over the interval of 0 to 23 h. AUC Day 4 is the area under the curve for the active ingredient over the interval of 71 to 95 h.

Nonaerosol spray had n=10 participants with evaluable C<sub>max</sub> and AUC on Day 4 due to treatment interruptions

Pump spray had n=10 participants with evaluable C<sub>max</sub> and AUC on Day 4 due to treatment interruptions

Amount of active ingredient in the skin at day 7 and day 14 is reported for a subset of participants : avobenzone - lotion (n=10), aerosol spray (n=11), nonaerosol spray (n=9), and pump spray (n=8); oxybenzone - lotion (n=10) and aerosol spray (n=11); octocrylene - lotion (n=10), aerosol spray (n=11), and nonaerosol spray (n=9); homosalate - aerosol spray (n=10), nonaerosol spray (n=9), and pump spray (n=6); octisalate - aerosol spray (n=10), nonaerosol spray (n=9), and pump spray (n=6); and octinoxate - nonaerosol spray (n=9), and pump spray (n=7)

Terminal half-life is only reported for a subset of participants: avobenzone - lotion (n=11), aerosol spray (n=12), nonaerosol spray (n=7), and pump spray (n=6); oxybenzone - lotion (n=11) and aerosol spray (n=12); octocrylene - lotion (n=10), aerosol spray (n=8), and nonaerosol spray (n=8); homosalate - aerosol spray (n=11), nonaerosol spray (n=4), and pump spray (n=6); octisalate - aerosol spray (n=11), nonaerosol spray (n=5), and pump spray (n=5); and octinoxate - nonaerosol spray (n=5), and pump spray (n=5)

eTable 3. Percentage of Study Participants With Samples Exceeding 0.5 ng/mL at Select Time Points on Day 1 by Product and Ingredient

| Active Ingredient                             | Product                  | Timepoint on Day 1 (h) |                  |                  |                  | >0.5 ng/mL any time on Day 1 |
|-----------------------------------------------|--------------------------|------------------------|------------------|------------------|------------------|------------------------------|
|                                               |                          | 2                      | 4                | 6                | 8                |                              |
| Avobenzone<br>% patients >0.5<br>ng/mL [n/N]  | Lotion                   | 0%<br>[0/12]           | 41.7%<br>[5/12]  | 83.3%<br>[10/12] | 100%<br>[12/12]  | 100% [12/12]                 |
|                                               | Aerosol<br>spray         | 8.3%<br>[1/12]         | 33.3%<br>[4/12]  | 58.3%<br>[7/12]  | 66.7%<br>[8/12]  | 83.3% [10/12]                |
|                                               | Non-<br>aerosol<br>spray | 0%<br>[0/12]           | 8.3%<br>[1/12]   | 50%<br>[6/12]    | 58.3%<br>[7/12]  | 83.3% [10/12]                |
|                                               | Pump<br>spray            | 0%<br>[0/12]           | 16.7%<br>[2/12]  | 33.3%<br>[4/12]  | 41.7%<br>[5/12]  | 75% [9/12]                   |
| Oxybenzone<br>% patients >0.5<br>ng/mL [n/N]  | Lotion                   | 100%<br>[12/12]        | 100%<br>[12/12]  | 100%<br>[12/12]  | 100%<br>[12/12]  | 100% [12/12]                 |
|                                               | Aerosol<br>spray         | 100%<br>[12/12]        | 100%<br>[12/12]  | 100%<br>[12/12]  | 100%<br>[12/12]  | 100% [12/12]                 |
| Octocrylene<br>% patients >0.5<br>ng/mL [n/N] | Lotion                   | 0%<br>[0/12]           | 25%<br>[3/12]    | 58.3%<br>[7/12]  | 83.3%<br>[10/12] | 91.7% [11/12]                |
|                                               | Aerosol<br>spray         | 0%<br>[0/12]           | 25%<br>[3/12]    | 75%<br>[9/12]    | 75%<br>[9/12]    | 91.7% [11/12]                |
|                                               | Non-<br>aerosol<br>spray | 8.3%<br>[1/12]         | 16.7%<br>[2/12]  | 58.3%<br>[7/12]  | 66.7%<br>[8/12]  | 91.7% [11/12]                |
| Homosalate<br>% patients >0.5<br>ng/mL [n/N]  | Aerosol<br>spray         | 83.3%<br>[10/12]       | 100%<br>[12/12]  | 100%<br>[12/12]  | 100%<br>[12/12]  | 100% [12/12]                 |
|                                               | Non-<br>aerosol<br>spray | 50%<br>[6/12]          | 100%<br>[12/12]  | 100%<br>[12/12]  | 100%<br>[12/12]  | 100% [12/12]                 |
|                                               | Pump<br>spray            | 50%<br>[6/12]          | 83.3%<br>[10/12] | 100%<br>[12/12]  | 100%<br>[12/12]  | 100% [12/12]                 |
| Octisalate<br>% patients >0.5<br>ng/mL [n/N]  | Aerosol<br>spray         | 25%<br>[3/12]          | 75%<br>[9/12]    | 83.3%<br>[10/12] | 83.3%<br>[10/12] | 83.3% [10/12]                |
|                                               | Non-<br>aerosol<br>spray | 16.7%<br>[2/12]        | 58.3%<br>[7/12]  | 75%<br>[9/12]    | 91.7%<br>[11/12] | 100% [12/12]                 |
|                                               | Pump<br>spray            | 16.7%<br>[2/12]        | 33.3%<br>[4/12]  | 66.7%<br>[8/12]  | 66.7%<br>[8/12]  | 75% [9/12]                   |
| Octinoxate<br>% patients >0.5<br>ng/mL [n/N]  | Non-<br>aerosol<br>spray | 25%<br>[3/12]          | 58.3%<br>[7/12]  | 58.3%<br>[7/12]  | 83.3%<br>[10/12] | 100% [12/12]                 |
|                                               | Pump<br>spray            | 8.3%<br>[1/12]         | 25%<br>[3/12]    | 58.3%<br>[7/12]  | 66.7%<br>[8/12]  | 83.3% [10/12]                |

eTable 4. Number and Percentage of Adverse Events by Treatment Group

| Adverse Event                    | Lotion (N=12)<br>Incidence (number<br>of events) | Aerosol Spray<br>(N=12)<br>Incidence (number<br>of events) | Nonaerosol Spray<br>(N=12)<br>Incidence (number<br>of events) | Pump Spray<br>(N=12)<br>Incidence (number<br>of events) |
|----------------------------------|--------------------------------------------------|------------------------------------------------------------|---------------------------------------------------------------|---------------------------------------------------------|
| Application Site Erythema        | 2 (2)                                            | 0 (0)                                                      | 3 (5)                                                         | 0 (0)                                                   |
| Burning sensation                | 1 (1)                                            | 0 (0)                                                      | 0 (0)                                                         | 0 (0)                                                   |
| Cough                            | 1 (1)                                            | 0 (0)                                                      | 1 (1)                                                         | 0 (0)                                                   |
| Dizziness                        | 0 (0)                                            | 0 (0)                                                      | 0 (0)                                                         | 1 (1)                                                   |
| Ear pain                         | 0 (0)                                            | 1 (1)                                                      | 0 (0)                                                         | 0 (0)                                                   |
| Erythema                         | 2 (4)                                            | 0 (0)                                                      | 1 (2)                                                         | 0 (0)                                                   |
| Eye irritation                   | 0 (0)                                            | 2 (4)                                                      | 1 (1)                                                         | 1 (1)                                                   |
| Eye pain                         | 0 (0)                                            | 0 (0)                                                      | 1 (1)                                                         | 0 (0)                                                   |
| Headache                         | 2 (2)                                            | 0 (0)                                                      | 1 (1)                                                         | 0 (0)                                                   |
| Haematoma                        | 0 (0)                                            | 0 (0)                                                      | 1 (1)                                                         | 0 (0)                                                   |
| Hyperesthesia                    | 1 (1)                                            | 0 (0)                                                      | 0 (0)                                                         | 0 (0)                                                   |
| Nasal congestion                 | 0 (0)                                            | 1 (1)                                                      | 0 (0)                                                         | 0 (0)                                                   |
| Ocular hyperemia                 | 0 (0)                                            | 1 (1)                                                      | 1 (1)                                                         | 0 (0)                                                   |
| Oropharyngeal pain               | 1 (1)                                            | 0 (0)                                                      | 1 (1)                                                         | 0 (0)                                                   |
| Pain of skin                     | 0 (0)                                            | 0 (0)                                                      | 0 (0)                                                         | 1 (2)                                                   |
| Pruritus                         | 0 (0)                                            | 0 (0)                                                      | 0 (0)                                                         | 2 (2)                                                   |
| Rash                             | 1 (1)                                            | 6 (7)                                                      | 5 (11)                                                        | 2 (7)                                                   |
| Rhinorrhea                       | 0 (0)                                            | 1 (1)                                                      | 1 (1)                                                         | 0 (0)                                                   |
| Skin abrasion                    | 0 (0)                                            | 0 (0)                                                      | 1 (1)                                                         | 1 (1)                                                   |
| Skin disorder                    | 0 (0)                                            | 0 (0)                                                      | 0 (0)                                                         | 1 (1)                                                   |
| Skin irritation                  | 1 (2)                                            | 0 (0)                                                      | 0 (0)                                                         | 0 (0)                                                   |
| Sneezing                         | 1 (1)                                            | 0 (0)                                                      | 0 (0)                                                         | 0 (0)                                                   |
| Tenderness                       | 0 (0)                                            | 0 (0)                                                      | 0 (0)                                                         | 1 (1)                                                   |
| Vessel puncture site bruise      | 1 (1)                                            | 1 (1)                                                      | 1 (1)                                                         | 0 (0)                                                   |
| Vessel puncture site<br>hematoma | 0 (0)                                            | 0 (0)                                                      | 1 (1)                                                         | 0 (0)                                                   |
| Vessel puncture site pain        | 0 (0)                                            | 1 (1)                                                      | 1 (1)                                                         | 0 (0)                                                   |
| Vessel puncture site reaction    | 0 (0)                                            | 0 (0)                                                      | 1 (1)                                                         | 0 (0)                                                   |
| Vessel puncture site swelling    | 1 (1)                                            | 1 (1)                                                      | 0 (0)                                                         | 0 (0)                                                   |

First number stands for incidence and second number in parenthesis stands for number of events.

There were 12 subjects per treatment group.

This table reports all Medical Dictionary for Regulatory Activities (MedDRA v.21.1)-defined adverse events during the study

**eFigure 1. Pharmacokinetic Profiles of Sunscreen Active Ingredients Upon Multiple Applications**

Pharmacokinetic profiles of each ingredient by product from top to bottom: (A) lotion, (B) aerosol spray, (C) nonaerosol spray and (D) pump spray. Concentration profiles for each participant are shown for the study duration. The gray vertical shaded regions indicate the single application at 0 hours on day 1 and the 6-hour window (e.g., at 0, 2, 4 and 6 hours) of sunscreen application on day 2, 3, and 4. The black horizontal line denotes 0.5 ng/mL. Lower limit of quantitation (LLOQ) was 0.2 ng/mL for avobenzone and 0.4 ng/mL for oxybenzone, octocrylene, homosalate, octisalate, and octinoxate (horizontal gray line). All samples below the LLOQ were set to 0.1 ng/mL for plotting individual profiles in this figure. Lotion did not contain homosalate, octisalate, or octinoxate. Aerosol spray did not contain octinoxate. Nonaerosol spray did not contain oxybenzone. Pump spray did not contain oxybenzone or octocrylene.

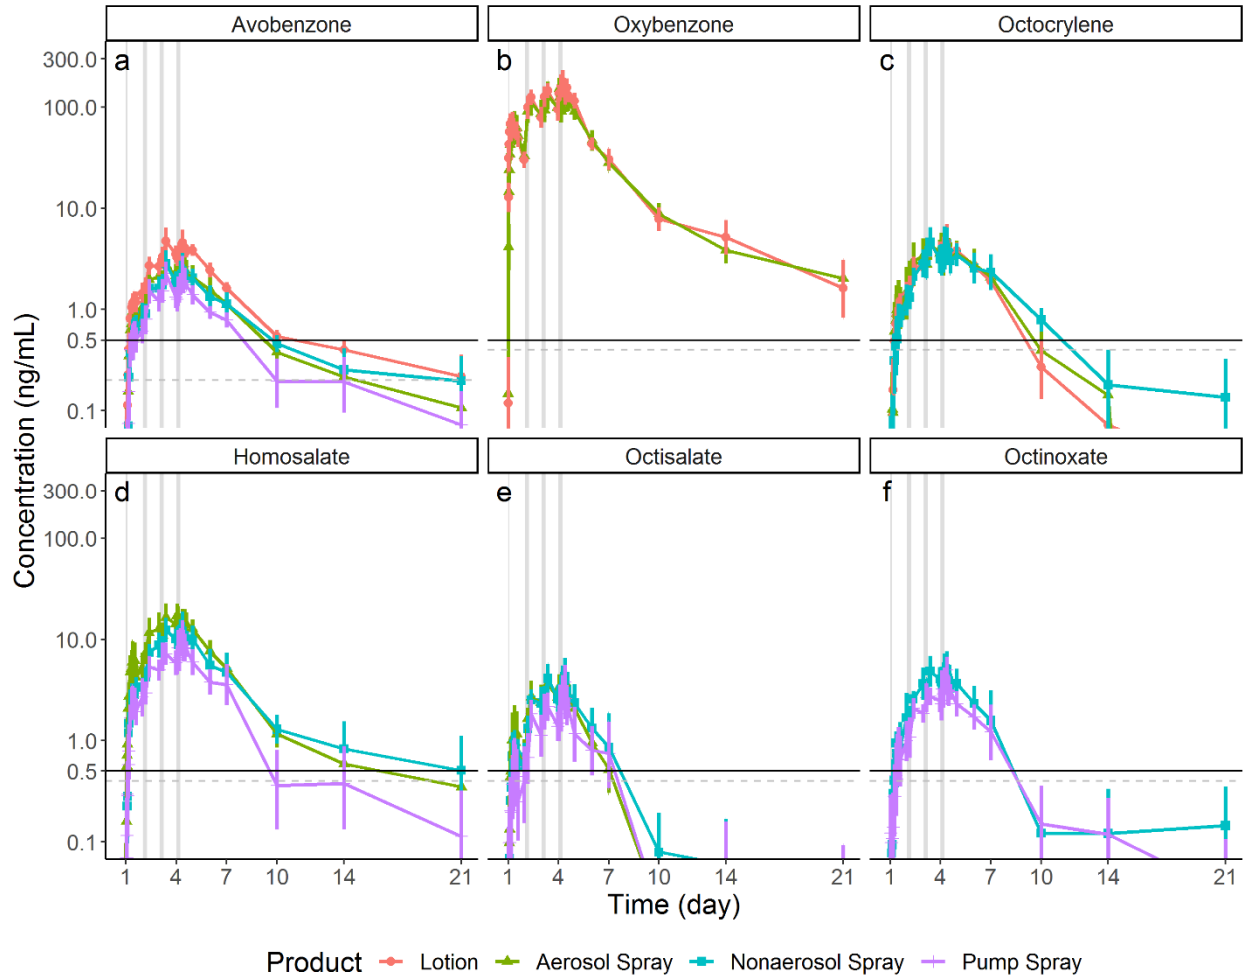

## eFigure 2. Pharmacokinetic Profiles of Sunscreen Active Ingredients Upon Single Application

Pharmacokinetic profile of each ingredient by product from top to bottom: (A) lotion, (B) aerosol spray, (C) nonaerosol spray and (D) pump spray. Concentration profile for each participant are shown for day 1. The arrows indicate sunscreen application at 0 hours. The black horizontal line denotes 0.5 ng/mL. Lower limit of quantitation (LLOQ) was 0.2 ng/mL for avobenzone and 0.4 ng/mL for oxybenzone, octocrylene, homosalate, octisalate, and octinoxate (horizontal gray line). All samples below the LLOQ were set to 0.1 ng/mL for plotting individual profiles in this figure. Lotion did not contain homosalate, octisalate, or octinoxate. Aerosol spray did not contain octinoxate. Nonaerosol spray did not contain oxybenzone. Pump spray did not contain oxybenzone or octocrylene.

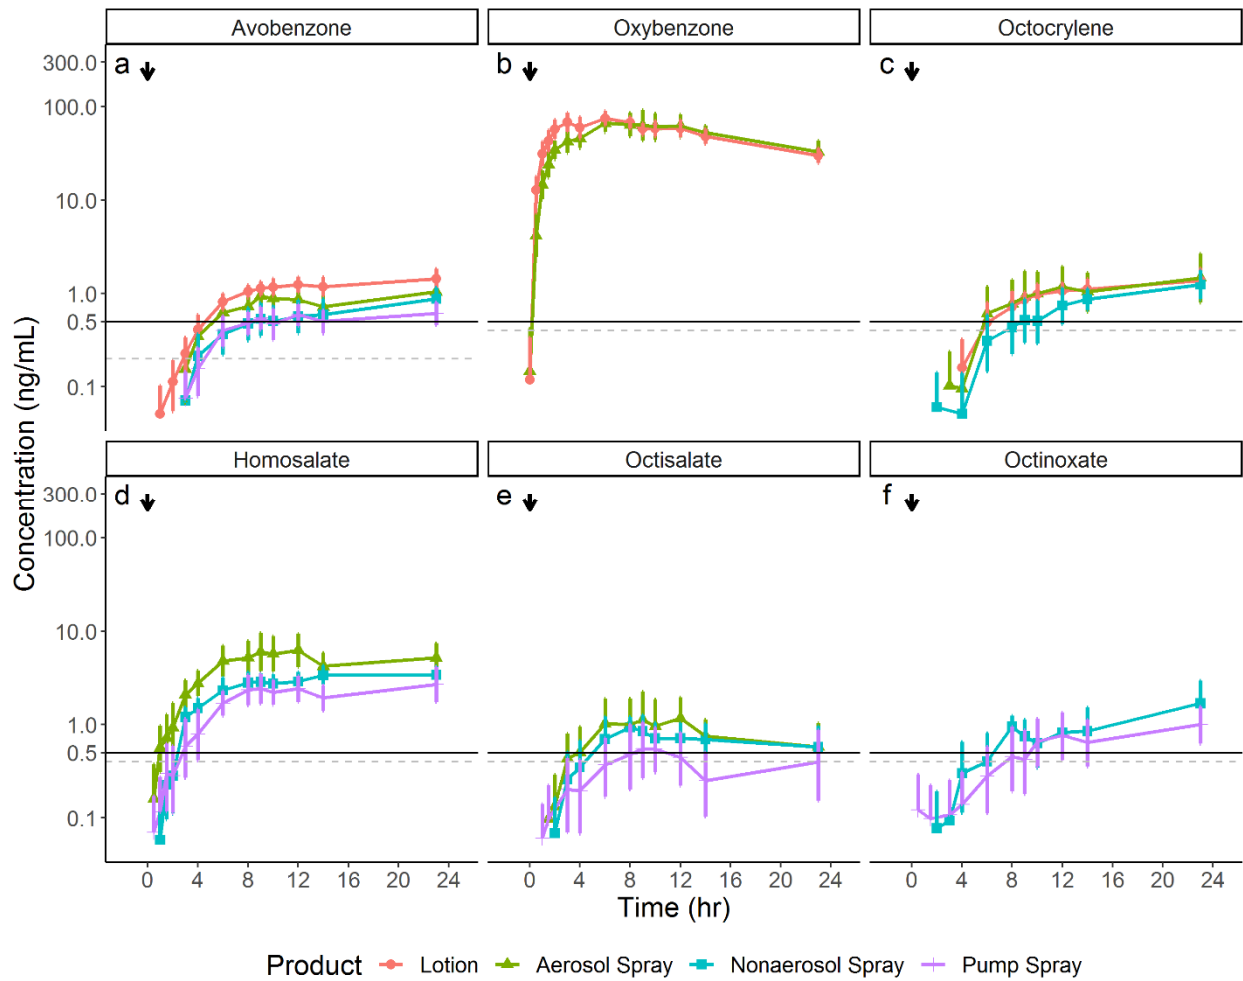

**eMethods.**

Liquid chromatography tandem mass spectrometric assay methods were developed and validated to support the analysis of clinical study samples. All the assays were developed with the aim of high sensitivity with reliable quantitation. While optimizing the lower limit of quantitation (LLOQ) of each analyte, various parameters like signal to noise, accuracy, and precision were evaluated. The upper limit of quantitation (ULOQ) was selected based on the concentration at which acceptable linearity range was observed (i.e., concentration vs linear detector response). The details of individual methods and validation parameters are described below.

## eMethods 1. Bioanalytical Method Conditions for Avobenzone and Oxybenzone in Plasma

Validation range: 0.2–12 ng/mL for Avobenzone and 0.4–300 ng/mL for Oxybenzone  
High Performance Liquid Chromatography (HPLC) instrument: Agilent 1290 Infinity  
Mass Spectrometer: AB SCIEX 6500+ Mass spectrometer

### HPLC Conditions

Mobile Phase: 10 mM Ammonium formate with 0.1% Formic acid in water and methanol (24: 76, v/v)  
Flow rate: 0.7 mL/min  
Column: Acquity UPLC® BEH Shield RP18 (2.1 x 50 mm) 1.7 µm  
Injection Volume: 5 µL  
Retention Time: Avobenzone and Avobenzone-d<sub>3</sub>: 2.00 minute  
Oxybenzone and Oxybenzone-d<sub>3</sub>: 0.50 minute  
Run Time: 3.0 minutes

### Mass Spectrometer conditions

Ionization Source and scan type: Atmospheric Pressure Chemical Ionization (APCI);  
Multiple Reaction Monitoring (MRM)  
Data acquisition: Analyst 1.6.3

AB SCIEX 6500+ Q-TRAP mass spectrometer state file parameters:

| Parameter                         | Avobenzone  | Avobenzone-d <sub>3</sub> (IS1) | Oxybenzone  | Oxybenzone-d <sub>3</sub> (IS2) |
|-----------------------------------|-------------|---------------------------------|-------------|---------------------------------|
| Q1 mass/Q3 mass (amu)             | 311.2/161.2 | 314.2/161.2                     | 229.2/151.2 | 232.2/154.1                     |
| Declustering potential, V         | 100         | 100                             | 100         | 100                             |
| Collision Energy (V)              | 31          | 31                              | 25          | 27                              |
| Collision Cell Exit Potential (V) | 11          | 11                              | 11          | 11                              |
| Source Temperature (° C):         | 500         | 500                             | 500         | 500                             |
| Collision Gas (CAD)               | Medium      | Medium                          | Medium      | Medium                          |
| Curtain Gas (CUR)                 | 40          | 40                              | 40          | 40                              |
| Ion Source Gas 1 (GS1)            | 50          | 50                              | 50          | 50                              |
| Nebulizer Current                 | 3           | 3                               | 3           | 3                               |

**Sample Preparation for Avobenzone and Oxybenzone:** A 150 µL aliquot of the sample was added to Phree Phospholipid removal 96-well plates (Make: Phenomenex, Part no 8E-S133-TGB) and treated with 500 µL of acetonitrile containing 4.00 ng/mL of internal standard-1 (Avobenzone-d<sub>3</sub>) and 10.00 ng/mL of internal standard-2 (Oxybenzone-d<sub>3</sub>). The samples were vortexed for 4 min, followed by centrifugation at 5 g for 5 min. Then, 100µL of the filtrate was transferred to 96-well collection plates, 50µL of 10mM ammonium formate in 0.1% formic acid was added, and plates were shaken for 1 minute.



**Validation Summary Table for Avobenzone and Oxybenzone**

| <b>Description</b>             | <b>Avobenzone</b>                                                                                                               | <b>Oxybenzone</b>                                                                                                              |
|--------------------------------|---------------------------------------------------------------------------------------------------------------------------------|--------------------------------------------------------------------------------------------------------------------------------|
| Short description of method    | Protein precipitation with Phospholipid removal plates<br>Reverse-phase HPLC with tandem mass spectrometric detection           | Protein precipitation with Phospholipid removal plates<br>Reverse-phase HPLC with tandem mass spectrometric detection          |
| Biological matrix              | Human plasma (dipotassium ethylenediaminetetraacetic acid)                                                                      | Human plasma (dipotassium ethylenediaminetetraacetic acid)                                                                     |
| Analyte                        | Avobenzone                                                                                                                      | Oxybenzone                                                                                                                     |
| Internal standard (IS)         | Avobenzone -d <sub>3</sub>                                                                                                      | Oxybenzone-d <sub>3</sub>                                                                                                      |
| Calibration concentrations     | 0.20 ng/mL to 12.00 ng/mL                                                                                                       | 0.40 ng/mL to 300.00 ng/mL                                                                                                     |
| QC concentrations              | 0.20 ng/mL, 0.60 ng/mL, 1.50 ng/mL, 6.00 ng/mL and 10.00 ng/mL                                                                  | 0.40 ng/mL, 1.20 ng/mL, 40.00 ng/mL, 150.00 ng/mL, and 260.00 ng/mL                                                            |
| Selectivity                    | No significant interference observed in the 16 blank matrix lots screened.                                                      | No significant interference observed in the 16 blank matrix lots screened.                                                     |
| Specificity                    | No significant interference observed.                                                                                           | No significant interference observed.                                                                                          |
| Lower limit of quantitation    | 0.20 ng/mL<br>Between-run accuracy 108%<br>Between-run precision 11%<br>Within-run accuracy 108%<br>Within-run precision 9%     | 0.40 ng/mL<br>Between-run accuracy 101%<br>Between-run precision 11%<br>Within-run accuracy 111%<br>Within-run precision 5%    |
| Between-run accuracy           | 94% to 104%                                                                                                                     | 96% to 101%                                                                                                                    |
| Between-run precision          | 4% to 9%                                                                                                                        | 2% to 8%                                                                                                                       |
| Within-run accuracy            | 91% to 104%                                                                                                                     | 95% to 105%                                                                                                                    |
| Within-run precision           | 3% to 8%                                                                                                                        | 1% to 6%                                                                                                                       |
| IS normalized matrix factor    | LQC: 1.13 (%CV: 3)<br>HQC: 1.00 (%CV: 3)                                                                                        | LQC: 1.12 (%CV: 7)<br>HQC: 1.02 (%CV: 1)                                                                                       |
| Dilution integrity             | Concentration 36.00 ng/mL<br>Diluted 5-fold:<br>Accuracy 103%, Precision 4%<br>Diluted 10-fold:<br>Accuracy 104%, Precision 4%. | Concentration 900.00 ng/mL<br>Diluted 5-fold:<br>Accuracy 99%, Precision 2%<br>Diluted 10-fold:<br>Accuracy 100%, Precision 2% |
| Recovery of analyte            | 76% -85%                                                                                                                        | 98% -105%                                                                                                                      |
| Recovery of IS                 | 81%                                                                                                                             | 90%                                                                                                                            |
| Auto-sampler storage stability | Confirmed up to 35 hours at 5°C nominal<br>Accuracy 107% for LQC and 99% for HQC                                                | Confirmed up to 35 hours at 5°C nominal<br>Accuracy 97% for LQC and 100% for HQC                                               |
| Freeze thaw stability          | Confirmed up to five cycles<br>Accuracy 103% for LQC and 106% for HQC                                                           | Confirmed up to five cycles<br>Accuracy 112% for LQC and 104% for HQC                                                          |

| <b>Description</b>                                                                                    | <b>Avobenzone</b>                                                                     | <b>Oxybenzone</b>                                                                     |
|-------------------------------------------------------------------------------------------------------|---------------------------------------------------------------------------------------|---------------------------------------------------------------------------------------|
| Bench top stability                                                                                   | Confirmed up to 15 hours at 24°C nominal<br>Accuracy 104% for LQC and 111% for HQC    | Confirmed up to 15 hours at 24°C nominal<br>Accuracy 113% for LQC and 105% for HQC    |
| Stock solution stability                                                                              | Confirmed up to 90 days at -20°C nominal.<br>%Stability 102%                          | Confirmed up to 90 days at -20°C nominal.<br>%Stability 101%                          |
| Injector Carryover                                                                                    | Not significant (not detected)                                                        | Not significant (not detected)                                                        |
| Co-administration drug effect                                                                         | Accuracy LQC: 113%<br>Accuracy HQC: 107%                                              | Accuracy LQC: 101%<br>Accuracy HQC: 103%                                              |
| Long term Stability in Plasma                                                                         | Confirmed up to 187 days at -80°C nominal<br>% Stability 104% for LQC and 99% for HQC | Confirmed up to 187 days at -80°C nominal<br>% Stability 96% for LQC and 100% for HQC |
| QC: Quality control; LQC: Low quality control; HQC: High quality control; CV: Coefficient of variance |                                                                                       |                                                                                       |

## eMethods 2. Bioanalytical Method Conditions for Octocrylene in Plasma

Validation range: 0.4–20 ng/mL  
 High Performance Liquid Chromatography (HPLC) instrument: Agilent 1290 Infinity  
 Mass Spectrometer: AB SCIEX 6500+ Mass spectrometer

### HPLC Conditions

Mobile Phase: 10 mM Ammonium formate with 0.1% Formic acid in water and methanol (15: 85, v/v)  
 Flow rate: 0.4 mL/min  
 Column: Acquity UPLC® BEH Shield RP18 (2.1 x 50 mm) 1.7 µm  
 Injection Volume: 5 µL  
 Retention Time: Octocrylene and Octocrylene -d<sub>15</sub>: 0.9 minute  
 Run Time: 2.0 minutes

### Mass Spectrometer conditions

Ionization Source and scan type: Atmospheric Pressure Chemical Ionization (APCI);  
 Multiple Reaction Monitoring (MRM)

Data acquisition: Analyst 1.6.3

AB SCIEX 6500+ Q-TRAP mass spectrometer state file parameters:

| Parameter                         | Octocrylene Ammonium adduct | Octocrylene -d <sub>15</sub> |
|-----------------------------------|-----------------------------|------------------------------|
| Q1 mass/Q3 mass (amu)             | 379.0/250.0                 | 377.1/251.1                  |
| Declustering potential, V         | 50                          | 60                           |
| Collision Energy (V)              | 15                          | 15                           |
| Collision Cell Exit Potential (V) | 11                          | 11                           |
| Source Temperature (° C):         | 500                         | 500                          |
| Collision Gas (CAD)               | Medium                      | Medium                       |
| Curtain Gas (CUR)                 | 40                          | 40                           |
| Ion Source Gas 1 (GS1)            | 50                          | 50                           |
| Nebulizer Current                 | 3                           | 3                            |

**Sample Preparation Octocrylene:** 150 µL of acetonitrile containing 20 ng/mL of octocrylene-d<sub>15</sub> was added to MultiScreen® solvint protein precipitation 96-well plates (0.45µm, Low-Binding, Hydrophilic) (Make: Merck, Part no MSRLN0450) and a 50 µL aliquot of plasma sample was added to each well. The samples were vortexed for 5 min, followed by centrifugation at 4000 rpm for 5 min. Then, 50µL of 10mM ammonium formate in 0.1% formic acid was added and plates were shaken for 1 minute.

### Validation Summary Table for Octocrylene

| Description                 | Octocrylene                                                                                              |
|-----------------------------|----------------------------------------------------------------------------------------------------------|
| Short description of method | Protein precipitation with 96-well plates<br>Reverse-phase HPLC with tandem mass spectrometric detection |
| Biological matrix           | Human plasma (dipotassium ethylenediaminetetraacetic acid)                                               |
| Analyte                     | Octocrylene                                                                                              |
| Internal standard (IS)      | Octocrylene -d <sub>15</sub>                                                                             |
| Calibration concentrations  | 0.40 ng/mL to 20.00 ng/mL                                                                                |

| <b>Description</b>                                                                                    | <b>Octocrylene</b>                                                                                                             |
|-------------------------------------------------------------------------------------------------------|--------------------------------------------------------------------------------------------------------------------------------|
| QC concentrations                                                                                     | 0.40 ng/mL, 1.20 ng/mL, 3.00 ng/mL, 10.00 ng/mL and 18.00 ng/mL                                                                |
| Selectivity                                                                                           | No significant interference observed in the 10 blank matrix lots screened.                                                     |
| Specificity                                                                                           | No significant interference observed.                                                                                          |
| Lower limit of quantitation                                                                           | 0.40 ng/mL<br>Between-run accuracy 101%<br>Between-run precision 14%<br>Within-run accuracy 105%<br>Within-run precision 9%    |
| Between-run accuracy                                                                                  | 98% to 104%                                                                                                                    |
| Between-run precision                                                                                 | 6% to 9%                                                                                                                       |
| Within-run accuracy                                                                                   | 101% to 104%                                                                                                                   |
| Within-run precision                                                                                  | 3% to 7%                                                                                                                       |
| IS normalized matrix factor                                                                           | LQC: 0.93 (%CV: 13)<br>HQC: 1.04 (%CV: 5)                                                                                      |
| Dilution integrity                                                                                    | Concentration 60.00 ng/mL<br>Diluted 5-fold:<br>Accuracy 104%, Precision 5%<br>Diluted 10-fold:<br>Accuracy 111%, Precision 4% |
| Recovery of analyte                                                                                   | 91% -102%                                                                                                                      |
| Recovery of IS                                                                                        | 107%                                                                                                                           |
| Auto-sampler storage stability                                                                        | Confirmed up to 36 hours at 5°C nominal.<br>Accuracy 103% for LQC and 98% for HQC                                              |
| Freeze thaw stability                                                                                 | Confirmed up to seven cycles, Accuracy 90% for LQC and 98% for HQC                                                             |
| Bench top stability                                                                                   | Confirmed up to 15 hours at 24°C nominal.<br>Accuracy 88% for LQC and 88% for HQC                                              |
| Stock solution stability                                                                              | Confirmed up to 45 days at -20°C nominal.<br>%Stability 97%                                                                    |
| Injector Carryover                                                                                    | Not significant (not detected)                                                                                                 |
| Co-administration drug effect                                                                         | Accuracy LQC: 109%<br>Accuracy HQC: 103%                                                                                       |
| Long term Stability in Plasma                                                                         | Confirmed up to 168 days at -80°C nominal<br>% Stability 103% for LQC and 87% for HQC                                          |
| QC: Quality control; LQC: Low quality control; HQC: High quality control; CV: Coefficient of variance |                                                                                                                                |

### eMethods 3. Bioanalytical Method Conditions for Homosalate, Octisalate, and Octinoxate in Plasma

Validation range: 0.4–40 ng/mL for Homosalate, Octisalate and Octinoxate  
High Performance Liquid Chromatography (HPLC) Instrument: Agilent 1290 Infinity  
Mass Spectrometer: AB SCIEX 6500+ Mass spectrometer

#### HPLC Conditions

Mobile Phase A: 0.1% Ammonium hydroxide in water  
Mobile Phase B: Methanol

#### Gradient Table:

| Time (min) | Flow (mL/min) | A (%) | B (%) |
|------------|---------------|-------|-------|
| 0.0        | 0.7           | 80    | 20    |
| 0.2        | 0.7           | 80    | 20    |
| 0.3        | 0.7           | 26    | 74    |
| 3.2        | 0.7           | 26    | 74    |
| 3.5        | 0.7           | 80    | 20    |
| 3.8        | 0.7           | 80    | 20    |

Column: Acquity UPLC BEH C<sub>18</sub> (2.1 x 50 mm) 1.8 µm  
Injection Volume: 10 µL  
Autosampler Temperature: 5°C  
Column Temperature: 40 °C  
Retention Time: Homosalate: 2.90 minute  
Homosalate-d<sub>4</sub>: 2.90 minute  
Octisalate: 2.70 minute  
Octisalate-d<sub>4</sub>: 2.70 minute  
Octinoxate: 2.60 minute  
Octinoxate-d<sub>3</sub>: 2.60 minute  
Run Time: 3.8 minutes

#### Mass Spectrometer Conditions

Ionization Source and Scan type: Atmospheric Pressure Chemical Ionization (APCI)  
Multiple Reaction Monitoring (MRM)  
Polarity: Positive and negative switch  
Data acquisition: Analyst 1.6.3

AB SCIEX 6500+ Q-TRAP mass spectrometer state file parameters:

| Parameter                         | Positive mode |                               | Negative mode |                               |             |                               |
|-----------------------------------|---------------|-------------------------------|---------------|-------------------------------|-------------|-------------------------------|
|                                   | Octinoxate    | Octinoxate<br>-d <sub>3</sub> | Homosalate    | Homosalate-<br>d <sub>4</sub> | Octisalate  | Octisalate-<br>d <sub>4</sub> |
| Q1 mass/Q3 mass (amu)             | 291.0/179.2   | 294.2/182.3                   | 261.2/137.0   | 265.2/141.1                   | 249.2/136.9 | 253.2/141.0                   |
| Declustering potential, V         | 38            | 25                            | -65           | -65                           | -75         | -75                           |
| Collision Energy (V)              | 11            | 11                            | -25           | -25                           | -24         | -25                           |
| Collision Cell Exit Potential (V) | 11            | 11                            | -14           | -14                           | -15         | -15                           |
| Entrance potential, V             | 10            | 10                            | -10           | -10                           | -10         | -10                           |
| Source Temperature (°C):          | 550           | 550                           | 550           | 550                           | 550         | 550                           |
| Collision Gas (CAD)               | Medium        | Medium                        | Medium        | Medium                        | Medium      | Medium                        |
| Curtain Gas (CUR)                 | 30            | 30                            | 30            | 30                            | 30          | 30                            |
| Ion Source Gas (GS1)              | 40            | 40                            | 40            | 40                            | 40          | 40                            |
| Ion Source Gas (GS2)              | 50            | 50                            | 50            | 50                            | 50          | 50                            |
| Nebulizer Current                 | 3             | 3                             | -3            | -3                            | -3          | -3                            |
| Dwell time (ms)                   | 100           | 50                            | 100           | 50                            | 100         | 50                            |

**Sample Preparation:** A 150 µL of acetonitrile containing internal standards (20 ng/mL of Homosalate -d<sub>4</sub>, 10 ng/mL of Octisalate -d<sub>4</sub>, and 10 ng/mL of Octinoxate -d<sub>3</sub>) was added to MultiScreen® solvinert protein precipitation plates (0.45µm, Low-Binding, Hydrophilic PTFE) 96 well plates (Make: Merck, Part no MSRLN0450) and an aliquot of 50 µL of plasma sample was added to each Well. The samples were vortexed for 5 min, followed by centrifugation at 4000 rpm for 5 min.

**Validation Summary Table for Homosalate, Octisalate and Octinoxate in Plasma**

| <b>Description</b>             | <b>Homosalate</b>                                                                                                              | <b>Octisalate</b>                                                                                                              | <b>Octinoxate</b>                                                                                                              |
|--------------------------------|--------------------------------------------------------------------------------------------------------------------------------|--------------------------------------------------------------------------------------------------------------------------------|--------------------------------------------------------------------------------------------------------------------------------|
| Short description of method    | Protein precipitation<br>Reverse-phase HPLC with MS/MS detection                                                               | Protein precipitation<br>Reverse-phase HPLC with MS/MS detection                                                               | Protein precipitation<br>Reverse-phase HPLC with MS/MS detection                                                               |
| Biological matrix              | Human plasma (K <sub>2</sub> EDTA)                                                                                             | Human plasma (K <sub>2</sub> EDTA)                                                                                             | Human plasma (K <sub>2</sub> EDTA)                                                                                             |
| Analyte                        | Homosalate                                                                                                                     | Octisalate                                                                                                                     | Octinoxate                                                                                                                     |
| Internal standard (IS)         | Homosalate-d <sub>4</sub>                                                                                                      | Octisalate-d <sub>4</sub>                                                                                                      | Octinoxate-d <sub>3</sub>                                                                                                      |
| Calibration concentrations     | 0.40 ng/mL to 40.00 ng/mL                                                                                                      | 0.40 ng/mL to 40.00 ng/mL                                                                                                      | 0.40 ng/mL to 40.00 ng/mL                                                                                                      |
| QC concentrations              | 0.40 ng/mL, 1.20 ng/mL, 2.00 ng/mL, 20.00 ng/mL and 34.00 ng/mL                                                                | 0.40 ng/mL, 1.20 ng/mL, 2.00 ng/mL, 20.00 ng/mL and 34.00 ng/mL                                                                | 0.40 ng/mL, 1.20 ng/mL, 2.00 ng/mL, 20.00 ng/mL and 34.00 ng/mL                                                                |
| Selectivity                    | No interference observed                                                                                                       | No interference observed                                                                                                       | No interference observed                                                                                                       |
| Specificity                    | No interference observed                                                                                                       | No interference observed                                                                                                       | No interference observed                                                                                                       |
| Lower limit of quantification  | 0.40 ng/mL<br>Between-run accuracy 103%<br>Between-run precision 15%<br>Within-run accuracy 111%<br>Within-run precision 14%   | 0.40 ng/mL<br>Between-run accuracy 100%<br>Between-run precision 15%<br>Within-run accuracy 108%<br>Within-run precision 12%   | 0.40 ng/mL<br>Between-run accuracy 104%<br>Between-run precision 14%<br>Within-run accuracy 109%<br>Within-run precision 16%   |
| Between-run accuracy           | 95% to 103%                                                                                                                    | 97% to 106%                                                                                                                    | 95% to 105%                                                                                                                    |
| Between-run precision          | 5% to 12%                                                                                                                      | 6% to 11%                                                                                                                      | 6% to 13%                                                                                                                      |
| Within-run accuracy            | 90% to 111%                                                                                                                    | 102% to 114%                                                                                                                   | 98% to 114%                                                                                                                    |
| Within-run precision           | 5% to 10%                                                                                                                      | 5% to 11%                                                                                                                      | 2% to 13%                                                                                                                      |
| Matrix effect (IS normalized)  | LQC: 1.00 (%CV: 4)<br>HQC: 1.03 (%CV: 4)                                                                                       | LQC: 0.89 (%CV: 3)<br>HQC: 1.03 (%CV: 4)                                                                                       | LQC: 1.07 (%CV: 7)<br>HQC: 1.11 (%CV: 2)                                                                                       |
| Dilution integrity             | Concentration 120.00 ng/mL<br>Diluted 5-fold:<br>Accuracy 91%, Precision 5%<br>Diluted 10-fold:<br>Accuracy 86%, Precision 11% | Concentration 120.00 ng/mL<br>Diluted 5-fold:<br>Accuracy 95%, Precision 7%<br>Diluted 10-fold:<br>Accuracy 90%, Precision 12% | Concentration 120.00 ng/mL<br>Diluted 5-fold:<br>Accuracy 90%, Precision 6%<br>Diluted 10-fold:<br>Accuracy 88%, Precision 10% |
| Recovery of analyte            | 111% -113%                                                                                                                     | 96% -107%                                                                                                                      | 106% -112%                                                                                                                     |
| Recovery of IS                 | 109%                                                                                                                           | 107%                                                                                                                           | 108%                                                                                                                           |
| Auto-sampler storage stability | Confirmed up to 36 hours at 5°C nominal<br>Accuracy 95% for LQC and 104% for HQC                                               | Confirmed up to 36 hours at 5°C nominal<br>Accuracy 105% for LQC and 104% for HQC                                              | Confirmed up to 36 hours at 5°C nominal<br>Accuracy 108% for LQC and 102% for HQC                                              |
| Freeze thaw stability          | Confirmed up to VII cycles<br>Accuracy 103% for LQC and 103% for HQC                                                           | Confirmed up to VII cycles<br>Accuracy 97% for LQC and 104% for HQC                                                            | Confirmed up to VII cycles<br>Accuracy 106% for LQC and 102% for HQC                                                           |

| <b>Description</b>                                                                                    | <b>Homosalate</b>                                                                 | <b>Octisalate</b>                                                                 | <b>Octinoxate</b>                                                                  |
|-------------------------------------------------------------------------------------------------------|-----------------------------------------------------------------------------------|-----------------------------------------------------------------------------------|------------------------------------------------------------------------------------|
| Bench top stability                                                                                   | Confirmed up to 5 hours on ice water bath<br>Accuracy 99% for LQC and 96% for HQC | Confirmed up to 5 hours on ice water bath<br>Accuracy 89% for LQC and 94% for HQC | Confirmed up to 5 hours on ice water bath<br>Accuracy 101% for LQC and 93% for HQC |
| Stock solution stability                                                                              | Confirmed up to 62 days at -20°C %Stability 98%                                   | Confirmed up to 62 days at -20°C %Stability 96%                                   | Confirmed up to 62 days at -20°C %Stability 93%                                    |
| Injector Carryover                                                                                    | Not significant (0.00%)                                                           | Not significant (0.00%)                                                           | Not significant (0.00)                                                             |
| Co-administration drug effect                                                                         | Accuracy 93% for LQC and 101% for HQC                                             | Accuracy 96% for LQC and 99% for HQC                                              | Accuracy 106% for LQC and 98% for HQC                                              |
| Long term Stability in Plasma                                                                         | Confirmed up to 173 days at -80°C<br>% Stability 108% for LQC and 102% for HQC    | Confirmed up to 173 days at -80°C<br>% Stability 109% for LQC and 99% for HQC     | Confirmed up to 173 days at -80°C<br>% Stability 105% for LQC and 99% for HQC      |
| QC: Quality Control; LQC: Low Quality Control; HQC: High Quality Control; CV: Coefficient of variance |                                                                                   |                                                                                   |                                                                                    |



#### eMethods 4. Bioanalytical Method Conditions for Avobenzone, Oxybenzone, and Octocrylene in Skin Samples

Validation range: 0.2–100 ng/mL for Avobenzone, 0.4–400 ng/mL for Oxybenzone and 0.4–100 ng/mL for Octocrylene

High Performance Liquid Chromatography

(HPLC) Instrument:

Agilent 1290 Infinity

Mass Spectrometer:

AB SCIEX 6500+ Mass spectrometer

##### *HPLC Conditions*

Mobile Phase:

10 mM Ammonium formate with 0.1% Formic acid in water and Methanol (24:76, v/v)

Flow Rate

0.7mL/min

Column:

Acquity UPLC BEH C<sub>18</sub> (2.1 x 50 mm) 1.8 μm

Injection Volume:

5 μL

Autosampler Temperature:

5°C

Column Temperature:

40 °C

Retention Time:

Avobenzone: 1.90 minute

Avobenzone-d<sub>3</sub>: 1.90 minute

Oxybenzone: 0.50 minute

Oxybenzone-d<sub>3</sub>: 0.50 minute

Octocrylene: 1.1 minute

Octocrylene -d<sub>15</sub>: 1.1 minute

Run Time:

3 minutes

##### *Mass Spectrometer Conditions*

Ionization Source and Scan type:

Atmospheric Pressure Chemical Ionization (APCI)  
Multiple Reaction Monitoring (MRM)

Polarity

Positive and negative switch

Data acquisition

Analyst 1.6.3

AB SCIEX 6500+ Q-TRAP mass spectrometer state file parameters:

| Parameter                                   | Avobenzone  | Avobenzone<br>-d <sub>3</sub> | Oxybenzone  | Oxybenzone<br>-d <sub>3</sub> | Octocrylene | Octocrylene<br>-d <sub>15</sub> |
|---------------------------------------------|-------------|-------------------------------|-------------|-------------------------------|-------------|---------------------------------|
| Q1 mass/Q3<br>mass (amu)                    | 311.2/161.2 | 314.2/161.2                   | 229.2/151.2 | 232.2/154.1                   | 379.0/250.0 | 377.1/251.1                     |
| Declustering<br>Potential, V                | 100         | 58                            | 100         | 100                           | 50          | 60                              |
| Collision<br>Energy (V)                     | 29          | 35                            | 27          | 27                            | 15          | 15                              |
| Collision Cell<br>Exit Potential<br>(V)     | 17          | 18                            | 13          | 13                            | 11          | 11                              |
| Entrance<br>Potential, V                    | 10          | 10                            | 10          | 10                            | 10          | 10                              |
| Nebulizer<br>Current (NC)                   | 3           | 3                             | 3           | 3                             | 3           | 3                               |
| Source<br>Temperature<br>( <sup>o</sup> C): | 550         | 550                           | 550         | 550                           | 550         | 550                             |
| Collision Gas<br>(CAD)                      | Medium      | Medium                        | Medium      | Medium                        | Medium      | Medium                          |
| Curtain Gas<br>(CUR)                        | 30          | 30                            | 30          | 30                            | 30          | 30                              |
| Ion Source Gas<br>(GS1)                     | 40          | 40                            | 40          | 40                            | 40          | 40                              |
| Ion Source Gas<br>(GS2)                     | 50          | 50                            | 50          | 50                            | 50          | 50                              |
| Dwell Time<br>(ms)                          | 50          | 100                           | 50          | 30                            | 100         | 50                              |

**Sample Preparation:** The analytes were extracted from the tapes using 80% acetonitrile in water. A 120 µL of acetonitrile containing internal standards (8 ng/mL of Avobenzone -d<sub>3</sub>, 16 ng/mL of Oxybenzone -d<sub>3</sub>, and 25 ng/mL of Octocrylene -d<sub>15</sub>) was added to 96 well autosampler loading plates and an aliquot of 30 µL of sample was added to each Well followed by 30µL of mobile phase buffer (10mM ammonium formate with 0.1% formic acid). The samples were shaken for 1 min and placed in autosampler.

**Validation Summary Table for Avobenzone, Oxybenzone and Octocrylene in Skin Samples**

| <b>Description</b>            | <b>Avobenzone</b>                                                                                                                                                                                                                                                                                         | <b>Oxybenzone</b>                                                                                                                                                                                                                                                                                         | <b>Octocrylene</b>                                                                                                                                                                                                                                                                                       |
|-------------------------------|-----------------------------------------------------------------------------------------------------------------------------------------------------------------------------------------------------------------------------------------------------------------------------------------------------------|-----------------------------------------------------------------------------------------------------------------------------------------------------------------------------------------------------------------------------------------------------------------------------------------------------------|----------------------------------------------------------------------------------------------------------------------------------------------------------------------------------------------------------------------------------------------------------------------------------------------------------|
| Short description of method   | Tape-Stripping Technique<br>Reverse-phase HPLC with MS/MS detection                                                                                                                                                                                                                                       | Tape-Stripping Technique<br>Reverse-phase HPLC with MS/MS detection                                                                                                                                                                                                                                       | Tape-Stripping Technique<br>Reverse-phase HPLC with MS/MS detection                                                                                                                                                                                                                                      |
| Biological matrix             | Skin samples                                                                                                                                                                                                                                                                                              | Skin samples                                                                                                                                                                                                                                                                                              | Skin samples                                                                                                                                                                                                                                                                                             |
| Analyte                       | Avobenzone                                                                                                                                                                                                                                                                                                | Oxybenzone                                                                                                                                                                                                                                                                                                | Octocrylene                                                                                                                                                                                                                                                                                              |
| Internal standard (IS)        | Avobenzone-d <sub>3</sub>                                                                                                                                                                                                                                                                                 | Oxybenzone-d <sub>3</sub>                                                                                                                                                                                                                                                                                 | Octocrylene-d <sub>15</sub>                                                                                                                                                                                                                                                                              |
| Calibration concentrations    | 0.20 ng/mL to 100.00 ng/mL                                                                                                                                                                                                                                                                                | 0.40 ng/mL to 300.00 ng/mL                                                                                                                                                                                                                                                                                | 0.40 ng/mL to 100.00 ng/mL                                                                                                                                                                                                                                                                               |
| QC concentrations             | 0.20 ng/mL, 0.60 ng/mL, 12.00 ng/mL, 50.00 ng/mL and 85.00 ng/mL                                                                                                                                                                                                                                          | 0.40 ng/mL, 1.20 ng/mL, 40.00 ng/mL, 150.00 ng/mL and 260.00 ng/mL                                                                                                                                                                                                                                        | 0.40 ng/mL, 1.20 ng/mL, 12.00 ng/mL, 50.00 ng/mL and 85.00 ng/mL                                                                                                                                                                                                                                         |
| Selectivity                   | No ant interference observed                                                                                                                                                                                                                                                                              | No interference observed                                                                                                                                                                                                                                                                                  | No interference observed                                                                                                                                                                                                                                                                                 |
| Specificity                   | No interference observed                                                                                                                                                                                                                                                                                  | No interference observed                                                                                                                                                                                                                                                                                  | No interference observed                                                                                                                                                                                                                                                                                 |
| Lower limit of quantification | 0.20 ng/mL<br>Between-run accuracy 102%<br>Between-run precision 17%<br>Within-run accuracy 118%<br>Within-run precision 11%                                                                                                                                                                              | 0.40 ng/mL<br>Between-run accuracy 104%<br>Between-run precision 14%<br>Within-run accuracy 110%<br>Within-run precision 9%                                                                                                                                                                               | 0.40 ng/mL<br>Between-run accuracy 109%<br>Between-run precision 18%<br>Within-run accuracy 116%<br>Within-run precision 18%                                                                                                                                                                             |
| Between-run accuracy          | 97% to 106%                                                                                                                                                                                                                                                                                               | 97% to 108%                                                                                                                                                                                                                                                                                               | 100% to 109%                                                                                                                                                                                                                                                                                             |
| Between-run precision         | 1% to 6%                                                                                                                                                                                                                                                                                                  | 2% to 4%                                                                                                                                                                                                                                                                                                  | 3% to 9%                                                                                                                                                                                                                                                                                                 |
| Within-run accuracy           | 98% to 111%                                                                                                                                                                                                                                                                                               | 97% to 107%                                                                                                                                                                                                                                                                                               | 103% to 112%                                                                                                                                                                                                                                                                                             |
| Within-run precision          | 1% to 4%                                                                                                                                                                                                                                                                                                  | 2% to 6%                                                                                                                                                                                                                                                                                                  | 2% to 6%                                                                                                                                                                                                                                                                                                 |
| Matrix effect (IS normalized) | LQC: 1.00 (%CV: 4)<br>HQC: 1.03 (%CV: 1)                                                                                                                                                                                                                                                                  | LQC: 0.97 (%CV: 2)<br>HQC: 0.99 (%CV: 1)                                                                                                                                                                                                                                                                  | LQC: 1.03 (%CV: 7)<br>HQC: 1.02 (%CV: 2)                                                                                                                                                                                                                                                                 |
| Dilution integrity            | Concentration 300.00 ng/mL for 5-fold and 10-fold and 2000.00 ng/mL for 50-fold and 300-fold<br>Diluted 5-fold:<br>Accuracy 105%, Precision 1%<br>Diluted 10-fold:<br>Accuracy 99%, Precision 0.4%<br>Diluted 50-fold:<br>Accuracy 104%, Precision 1%<br>Diluted 300-fold:<br>Accuracy 109%, Precision 2% | Concentration 900.00 ng/mL for 5-fold and 10-fold and 6000.00 ng/mL for 50-fold and 300-fold<br>Diluted 5-fold:<br>Accuracy 105%, Precision 1%<br>Diluted 10-fold:<br>Accuracy 99%, Precision 0.4%<br>Diluted 50-fold:<br>Accuracy 103%, Precision 1%<br>Diluted 300-fold:<br>Accuracy 111%, Precision 1% | Concentration 300.00 ng/mL for 5-fold and 10-fold and 2000.00 ng/mL for 50-fold and 300-fold<br>Diluted 5-fold:<br>Accuracy 105%, Precision 1%<br>Diluted 10-fold:<br>Accuracy 99%, Precision 0.4%<br>Diluted 50-fold:<br>Accuracy 97%, Precision 3%<br>Diluted 300-fold:<br>Accuracy 105%, Precision 6% |
| Recovery of analyte           | 96% -99%                                                                                                                                                                                                                                                                                                  | 95% -96%                                                                                                                                                                                                                                                                                                  | 94% -96%                                                                                                                                                                                                                                                                                                 |
| Recovery of IS                | 91%                                                                                                                                                                                                                                                                                                       | 97%                                                                                                                                                                                                                                                                                                       | 96%                                                                                                                                                                                                                                                                                                      |

| <b>Description</b>                                                                                    | <b>Avobenzone</b>                                                                 | <b>Oxybenzone</b>                                                                 | <b>Octocrylene</b>                                                                |
|-------------------------------------------------------------------------------------------------------|-----------------------------------------------------------------------------------|-----------------------------------------------------------------------------------|-----------------------------------------------------------------------------------|
| Auto-sampler storage stability                                                                        | Confirmed up to 34 hours at 5°C nominal<br>Accuracy 111% for LQC and 103% for HQC | Confirmed up to 34 hours at 5°C nominal<br>Accuracy 113% for LQC and 103% for HQC | Confirmed up to 34 hours at 5°C nominal<br>Accuracy 106% for LQC and 107% for HQC |
| Freeze thaw stability                                                                                 | Confirmed up to IV cycles<br>Accuracy 104% for LQC and 92% for HQC                | Confirmed up to IV cycles<br>Accuracy 102% for LQC and 92% for HQC                | Confirmed up to IV cycles<br>Accuracy 110% for LQC and 98% for HQC                |
| Bench top stability                                                                                   | Confirmed up to 8 hours<br>Accuracy 110% for LQC and 100% for HQC                 | Confirmed up to 8 hours<br>Accuracy 112% for LQC and 98% for HQC                  | Confirmed up to 8 hours<br>Accuracy 100% for LQC and 103% for HQC                 |
| Injector carryover                                                                                    | Not significant (0.00%)                                                           | Not significant (0.00%)                                                           | Not significant (0.00)                                                            |
| Co-administration drug effect                                                                         | Accuracy 109% for LQC and 97% for HQC                                             | Accuracy 108% for LQC and 98% for HQC                                             | Accuracy 106% for LQC and 99% for HQC                                             |
| Long term Stability in 80% Acetonitrile in Water (Extracted samples)                                  | Confirmed up to 49 days at -80°C<br>% Stability 98% for LQC and 103% for HQC      | Confirmed up to 49 days at -80°C<br>% Stability 105% for LQC and 104% for HQC     | Confirmed up to 49 days at -80°C<br>% Stability 95% for LQC and 105% for HQC      |
| QC: Quality Control; LQC: Low Quality Control; HQC: High Quality Control; CV: Coefficient of variance |                                                                                   |                                                                                   |                                                                                   |

## eMethods 5. Bioanalytical Method Conditions for Homosalate, Octisalate, and Octinoxate in Skin Samples

Validation range: 5–500 ng/mL for Homosalate and Octisalate; 5–300 ng/mL for Octinoxate

High Performance Liquid Chromatography

(HPLC) Instrument:

Agilent 1290 Infinity

Mass Spectrometer:

AB SCIEX 6500+ Mass spectrometer

### HPLC Conditions

Mobile Phase A:

0.1% Ammonium hydroxide in water

Mobile Phase B:

Methanol

Gradient Table:

| Time (min) | Flow (mL/min) | A (%) | B (%) |
|------------|---------------|-------|-------|
| 0.0        | 0.7           | 80    | 20    |
| 0.2        | 0.7           | 80    | 20    |
| 0.3        | 0.7           | 26    | 74    |
| 3.2        | 0.7           | 26    | 74    |
| 3.5        | 0.7           | 80    | 20    |
| 3.8        | 0.7           | 80    | 20    |

Column:

Acquity UPLC BEH C<sub>18</sub> (2.1 x 50 mm) 1.8 µm

Injection Volume:

10 µL

Autosampler Temperature:

5°C

Column Temperature:

40 °C

Retention Time:

Homosalate: 2.90 minute

Homosalate-d<sub>4</sub>: 2.90 minute

Octisalate: 2.70 minute

Octisalate-d<sub>4</sub>: 2.70 minute

Octinoxate: 2.60 minute

Octinoxate-d<sub>3</sub>: 2.60 minute

Run Time:

3.8 minutes

### Mass Spectrometer Conditions

Ionization Source and Scan type:

Electro Spray Ionization (ESI)

Multiple Reaction Monitoring (MRM)

Polarity

Positive and negative switch

Data acquisition

Analyst 1.6.3

AB SCIEX 6500+ Q-TRAP mass spectrometer state file parameters:

| Parameter                         | Positive mode |                               | Negative mode |                               |             |                               |
|-----------------------------------|---------------|-------------------------------|---------------|-------------------------------|-------------|-------------------------------|
|                                   | Octinoxate    | Octinoxate<br>-d <sub>3</sub> | Homosalate    | Homosalate-<br>d <sub>4</sub> | Octisalate  | Octisalate-<br>d <sub>4</sub> |
| Q1 mass/Q3 mass (amu)             | 291.0/179.0   | 294.2/182.3                   | 261.1/136.9   | 265.2/141.1                   | 249.0/136.9 | 253.2/141.0                   |
| Declustering potential, V         | 50            | 25                            | -80           | -65                           | -50         | -75                           |
| Collision Energy (V)              | 12            | 11                            | -25           | -25                           | -24         | -25                           |
| Collision Cell Exit Potential (V) | 11            | 11                            | -15           | -14                           | -15         | -15                           |
| Entrance potential, V             | 10            | 10                            | -10           | -10                           | -10         | -10                           |
| Source Temperature (°C):          | 550           | 550                           | 550           | 550                           | 550         | 550                           |
| Ion Spray Voltage, V              | 5500          | 5500                          | -4500         | -4500                         | -4500       | -4500                         |
| Collision Gas (CAD)               | Medium        | Medium                        | Medium        | Medium                        | Medium      | Medium                        |
| Curtain Gas (CUR)                 | 30            | 30                            | 30            | 30                            | 30          | 30                            |
| Ion Source Gas (GS1)              | 40            | 40                            | 40            | 40                            | 40          | 40                            |
| Ion Source Gas (GS2)              | 50            | 50                            | 50            | 50                            | 50          | 50                            |
| Dwell time (ms)                   | 100           | 50                            | 100           | 50                            | 100         | 50                            |

**Sample Preparation:** The analytes were extracted from the tapes using 80% acetonitrile in water. A 200 µL of acetonitrile containing internal standards (70 ng/mL of Homosalate -d<sub>4</sub>, 50 ng/mL of Octisalate -d<sub>4</sub>, and 15 ng/mL of Octinoxate -d<sub>3</sub>) was added to 96 well autosampler loading plates and an aliquot of 30 µL of sample was added to each Well. The samples were shaken for 1 min and placed in autosampler.

**Validation Summary Table for Homosalate, Octisalate and Octinoxate in Skin Samples**

| <b>Description</b>             | <b>Homosalate</b>                                                                                                                                                                                                                      | <b>Octisalate</b>                                                                                                                                                                                                                    | <b>Octinoxate</b>                                                                                                                                                                                                                      |
|--------------------------------|----------------------------------------------------------------------------------------------------------------------------------------------------------------------------------------------------------------------------------------|--------------------------------------------------------------------------------------------------------------------------------------------------------------------------------------------------------------------------------------|----------------------------------------------------------------------------------------------------------------------------------------------------------------------------------------------------------------------------------------|
| Short description of method    | Tape-Stripping Technique<br>Reverse-phase HPLC with MS/MS detection                                                                                                                                                                    | Tape-Stripping Technique<br>Reverse-phase HPLC with MS/MS detection                                                                                                                                                                  | Tape-Stripping Technique<br>Reverse-phase HPLC with MS/MS detection                                                                                                                                                                    |
| Biological matrix              | Skin samples                                                                                                                                                                                                                           | Skin samples                                                                                                                                                                                                                         | Skin samples                                                                                                                                                                                                                           |
| Analyte                        | Homosalate                                                                                                                                                                                                                             | Octisalate                                                                                                                                                                                                                           | Octinoxate                                                                                                                                                                                                                             |
| Internal standard (IS)         | Homosalate-d <sub>4</sub>                                                                                                                                                                                                              | Octisalate-d <sub>4</sub>                                                                                                                                                                                                            | Octinoxate-d <sub>3</sub>                                                                                                                                                                                                              |
| Calibration concentrations     | 5.00 ng/mL to 500.00 ng/mL                                                                                                                                                                                                             | 5.00 ng/mL to 500.00 ng/mL                                                                                                                                                                                                           | 05.00 ng/mL to 300.00 ng/mL                                                                                                                                                                                                            |
| QC concentrations              | 5.00 ng/mL, 15.00 ng/mL, 50.00 ng/mL, 250.00 ng/mL and 425.00 ng/mL                                                                                                                                                                    | 5.00 ng/mL, 15.00 ng/mL, 50.00 ng/mL, 250.00 ng/mL and 425.00 ng/mL                                                                                                                                                                  | 5.00 ng/mL, 15.00 ng/mL, 30.00 ng/mL, 150.00 ng/mL and 250.00 ng/mL                                                                                                                                                                    |
| Selectivity                    | No interference observed                                                                                                                                                                                                               | No interference observed                                                                                                                                                                                                             | No interference observed                                                                                                                                                                                                               |
| Specificity                    | No interference observed                                                                                                                                                                                                               | No interference observed                                                                                                                                                                                                             | No interference observed                                                                                                                                                                                                               |
| Lower limit of quantification  | 5.00 ng/mL<br>Between-run accuracy 96%<br>Between-run precision 9%<br>Within-run accuracy 101%<br>Within-run precision 6%                                                                                                              | 5.00 ng/mL<br>Between-run accuracy 99%<br>Between-run precision 8%<br>Within-run accuracy 103%<br>Within-run precision 8%                                                                                                            | 5.00 ng/mL<br>Between-run accuracy 102%<br>Between-run precision 12%<br>Within-run accuracy 99%<br>Within-run precision 12%                                                                                                            |
| Between-run accuracy           | 100% to 103%                                                                                                                                                                                                                           | 100% to 104%                                                                                                                                                                                                                         | 96% to 102%                                                                                                                                                                                                                            |
| Between-run precision          | 2% to 5%                                                                                                                                                                                                                               | 1% to 6%                                                                                                                                                                                                                             | 5% to 11%                                                                                                                                                                                                                              |
| Within-run accuracy            | 98% to 108%                                                                                                                                                                                                                            | 99% to 109%                                                                                                                                                                                                                          | 97% to 103%                                                                                                                                                                                                                            |
| Within-run precision           | 1% to 3%                                                                                                                                                                                                                               | 1% to 2%                                                                                                                                                                                                                             | 5% to 13%                                                                                                                                                                                                                              |
| Matrix effect (IS normalized)  | LQC: 1.02 (%CV: 3)<br>HQC: 1.00 (%CV: 1)                                                                                                                                                                                               | LQC: 1.05 (%CV: 3)<br>HQC: 1.00 (%CV: 1)                                                                                                                                                                                             | LQC: 1.02 (%CV: 10)<br>HQC: 0.99 (%CV: 11)                                                                                                                                                                                             |
| Dilution integrity             | Concentration 1500.00 ng/mL<br>Diluted 5-fold:<br>Accuracy 98%, Precision 1%<br>Diluted 10-fold:<br>Accuracy 102%, Precision 1%<br>Diluted 50-fold:<br>Accuracy 101%, Precision 4%<br>Diluted 100-fold:<br>Accuracy 107%, Precision 8% | Concentration 1500.00 ng/mL<br>Diluted 5-fold:<br>Accuracy 96%, Precision 1%<br>Diluted 10-fold:<br>Accuracy 102%, Precision 1%<br>Diluted 50-fold:<br>Accuracy 95%, Precision 4%<br>Diluted 100-fold:<br>Accuracy 87%, Precision 7% | Concentration 900.00 ng/mL<br>Diluted 5-fold:<br>Accuracy 96%, Precision 11%<br>Diluted 10-fold:<br>Accuracy 93%, Precision 9%<br>Diluted 50-fold:<br>Accuracy 107%, Precision 6%<br>Diluted 100-fold:<br>Accuracy 106%, Precision 11% |
| Recovery of analyte            | 90% -92%                                                                                                                                                                                                                               | 91% -92%                                                                                                                                                                                                                             | 85% -94%                                                                                                                                                                                                                               |
| Recovery of IS                 | 102%                                                                                                                                                                                                                                   | 102%                                                                                                                                                                                                                                 | 100%                                                                                                                                                                                                                                   |
| Auto-sampler storage stability | Confirmed up to 41 hours at 5°C nominal<br>Accuracy 108% for LQC and 100% for HQC                                                                                                                                                      | Confirmed up to 41 hours at 5°C nominal<br>Accuracy 106% for LQC and 99% for HQC                                                                                                                                                     | Confirmed up to 41 hours at 5°C nominal<br>Accuracy 99% for LQC and 97% for HQC                                                                                                                                                        |

| <b>Description</b>                                                                                    | <b>Homosalate</b>                                                                   | <b>Octisalate</b>                                                                   | <b>Octinoxate</b>                                                                   |
|-------------------------------------------------------------------------------------------------------|-------------------------------------------------------------------------------------|-------------------------------------------------------------------------------------|-------------------------------------------------------------------------------------|
| Freeze thaw stability                                                                                 | Confirmed up to IV cycles<br>Accuracy 109% for LQC and 103% for HQC                 | Confirmed up to IV cycles<br>Accuracy 109% for LQC and 104% for HQC                 | Confirmed up to IV cycles<br>Accuracy 104% for LQC and 104% for HQC                 |
| Bench top stability                                                                                   | Confirmed up to 6 hours on ice water bath<br>Accuracy 111% for LQC and 100% for HQC | Confirmed up to 6 hours on ice water bath<br>Accuracy 109% for LQC and 102% for HQC | Confirmed up to 6 hours on ice water bath<br>Accuracy 102% for LQC and 105% for HQC |
| Injector Carryover                                                                                    | Not significant (0.00%)                                                             | Not significant (0.00%)                                                             | Not significant (0.00)                                                              |
| Co-administration drug effect                                                                         | Accuracy 110% for LQC and 100% for HQC                                              | Accuracy 108% for LQC and 99% for HQC                                               | Accuracy 90% for LQC and 98% for HQC                                                |
| Long term Stability in 80% Acetonitrile in Water (Extracted Samples)                                  | Confirmed up to 39 days at -80°C<br>% Stability 105% for LQC and 100% for HQC       | Confirmed up to 39 days at -80°C<br>% Stability 98% for LQC and 101% for HQC        | Confirmed up to 39 days at -80°C<br>% Stability 104% for LQC and 100% for HQC       |
| QC: Quality Control; LQC: Low Quality Control; HQC: High Quality Control; CV: Coefficient of variance |                                                                                     |                                                                                     |                                                                                     |



## eDictionary. Data Dictionary for Participant Data Listings

A full listing of participant data, including demographics and concentration by product and analyte at each time point are included with this study. Column names and definitions are provided below:

| <b>Variable</b>       | <b>Definition</b>                                                                                                                                                                                                            |
|-----------------------|------------------------------------------------------------------------------------------------------------------------------------------------------------------------------------------------------------------------------|
| Participant           | Participant ID                                                                                                                                                                                                               |
| Product               | Administered product. One of Lotion, Aerosol spray, Nonaerosol spray, or Pump spray                                                                                                                                          |
| Analyte               | Measured analyte. One of Avobenzone, Oxybenzone, Octocrylene, Homosalate, Octisalate, or Octinoxate                                                                                                                          |
| Time                  | Nominal sampling time (unit = hours)                                                                                                                                                                                         |
| Concentration         | Reported concentration with BLQ values set to zero. (unit = ng/mL)                                                                                                                                                           |
| Matrix                | Denotes whether the sample was from plasma or skin                                                                                                                                                                           |
| Conc Units            | Units for the reported 'Concentration' variable. Units are ng/mL for plasma and ng/cm <sup>2</sup> for skin                                                                                                                  |
| BLQ                   | Denotes samples below the limit of quantitation. Limits were 0.2 ng/mL for Avobenzone, 0.4 ng/mL for Oxybenzone, 0.4 ng/mL for Octocrylene, 0.4 ng/mL for Homosalate, 0.4 ng/mL for Octisalate, and 0.4 ng/mL for Octinoxate |
| Age                   | Age of the participant (unit = years)                                                                                                                                                                                        |
| Sex                   | Sex of the participant (one of 'Female' or 'Male')                                                                                                                                                                           |
| Ethnicity             | Ethnicity of the participant (one of 'Hispanic or Latino' or 'Not Hispanic or Latino')                                                                                                                                       |
| Race                  | Race of the participant (one of 'Asian', 'Black or African American', or 'White')                                                                                                                                            |
| Height                | Height of the participant (unit = cm)                                                                                                                                                                                        |
| Weight                | Weight of the participant (unit = kg)                                                                                                                                                                                        |
| BMI                   | Body mass index of the participant (unit = kg/m <sup>2</sup> )                                                                                                                                                               |
| BSA                   | Body surface area of the participant (unit = m <sup>2</sup> )                                                                                                                                                                |
| Fitzpatrick Skin Type | Fitzpatrick Skin Type (one of I, II, III, IV, V, or VI)                                                                                                                                                                      |
