# Supplementary material
Source: PubMed Central journal article supplement (PMC6990686)
Supplement: jama-323-256-s004.pdf [file jama-323-256-s004.pdf]

## Data Sharing Statement

Matta. Effect of Sunscreen Application on Plasma Concentration of Sunscreen Active Ingredients. *JAMA*. Published January 21, 2020. 10.1001/jama.2019.20747

### Data

**Data available:** Yes

**Data types:** Other (please specify)

**Additional Information:** Uploaded as Supplement 3, data sharing document

**How to access data:** Uploaded as Supplement 3, data sharing document

**When available:** With publication

### Supporting Documents

**Document types:** None

### Additional Information

**Who can access the data:** Anyone

**Types of analyses:** Any purpose

**Mechanisms of data availability:** Without investigator support
